# Supplementary material for: Gišogenetic Variation in White-Spruce (Picea glauca (Moench) Voss) Trees of Yukon Beringia, Canada
Source: MDPI journal article supplement (doi:10.3390/f14040787), 2023-04-11

Mushrooms encountered in the East Fork locale, June to September. No attempt at full identification was made.

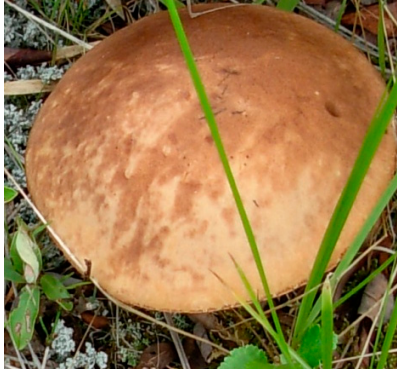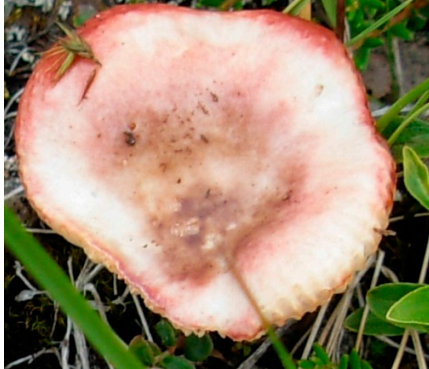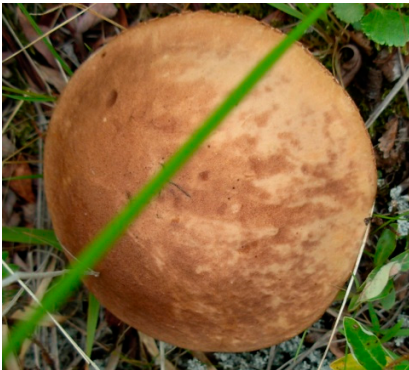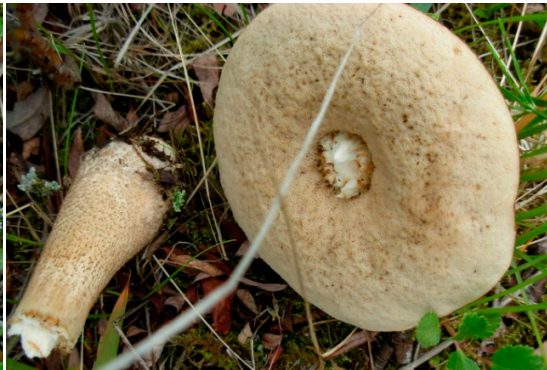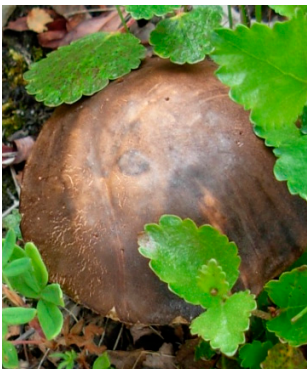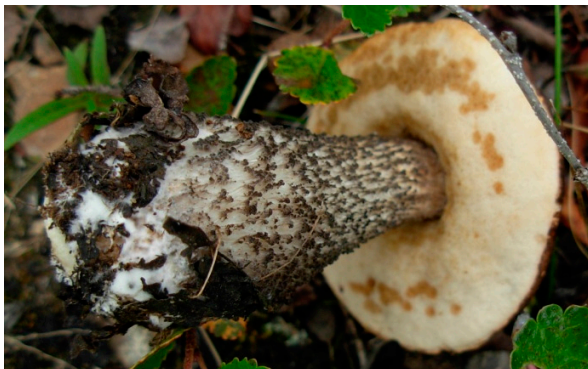

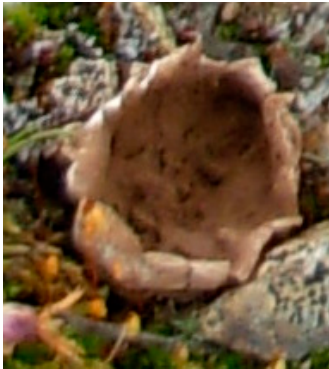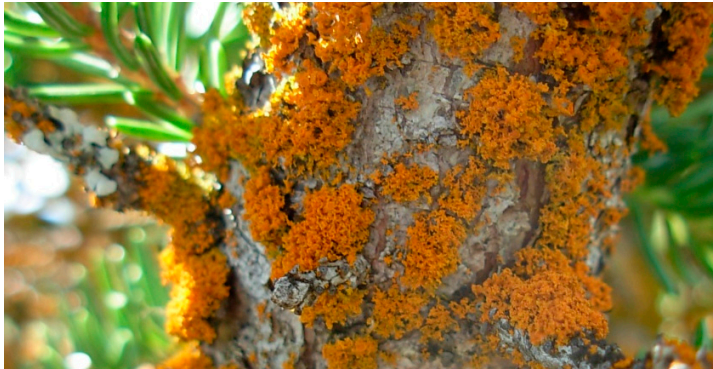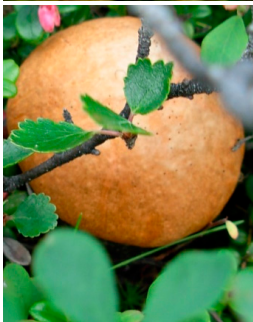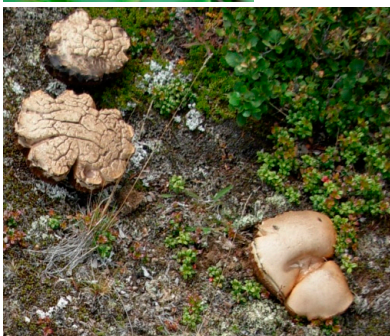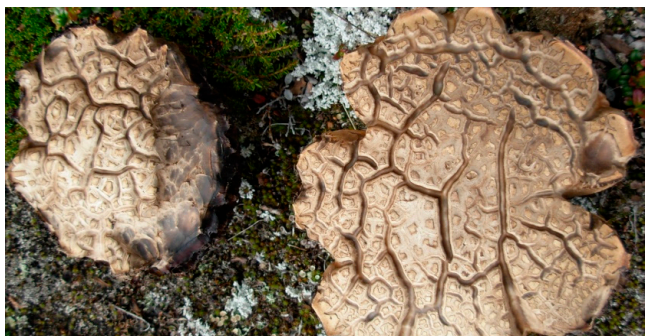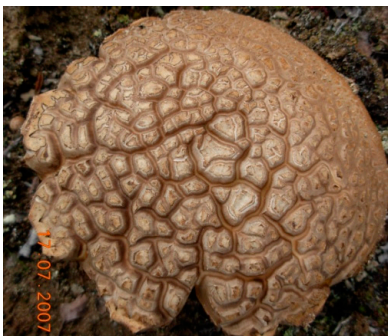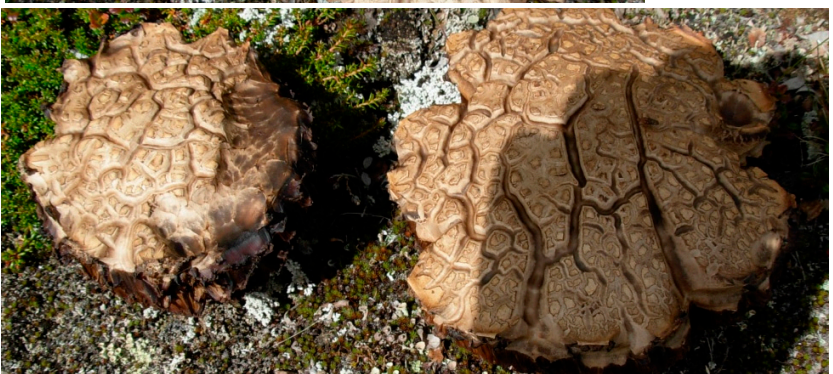



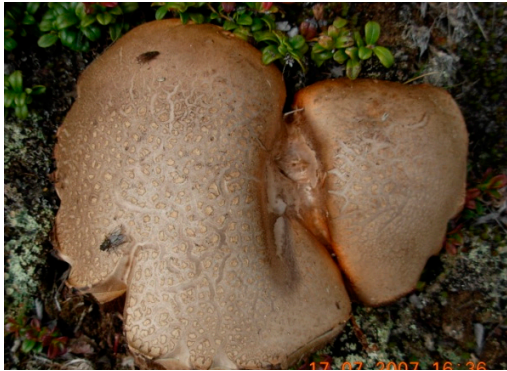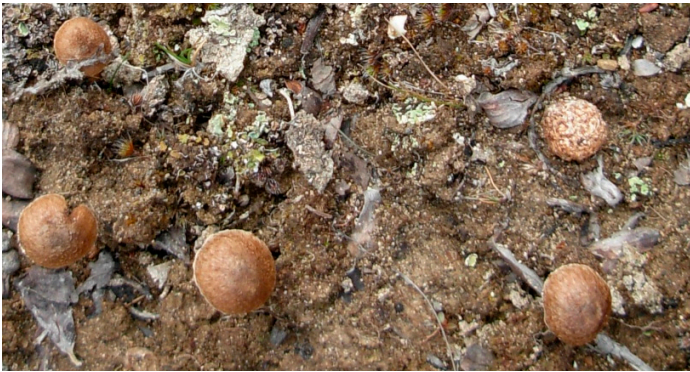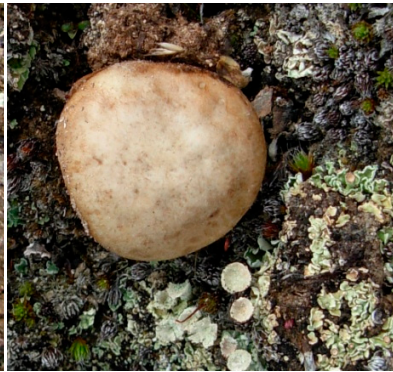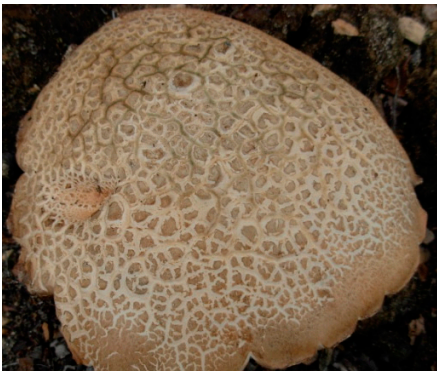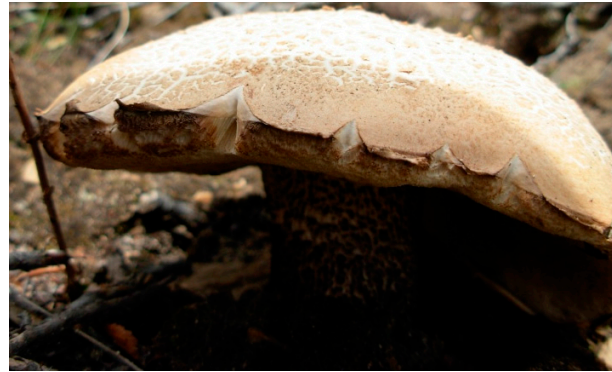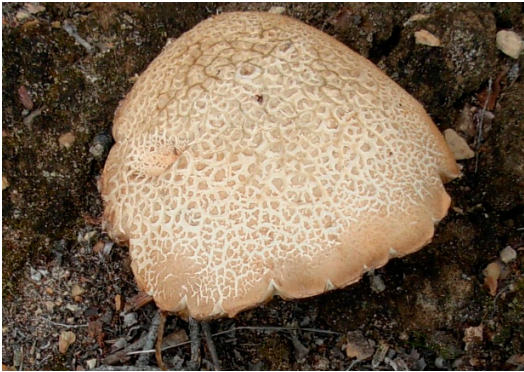

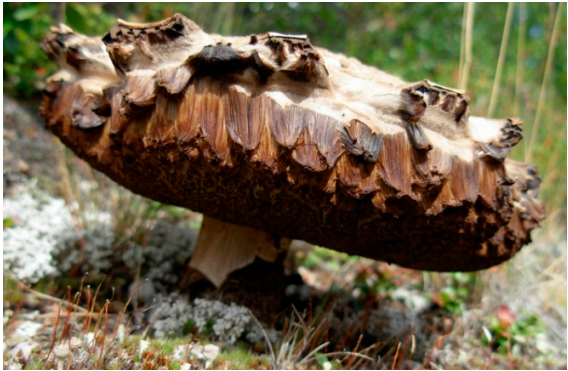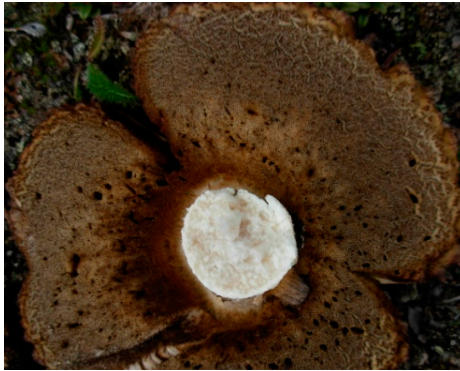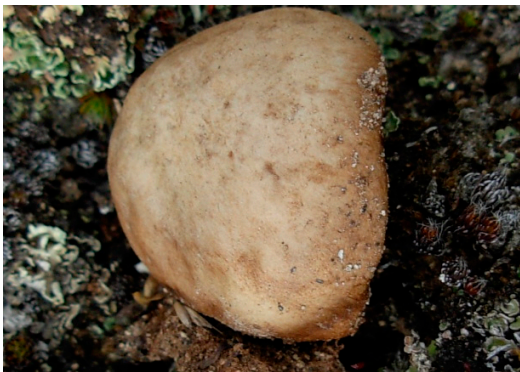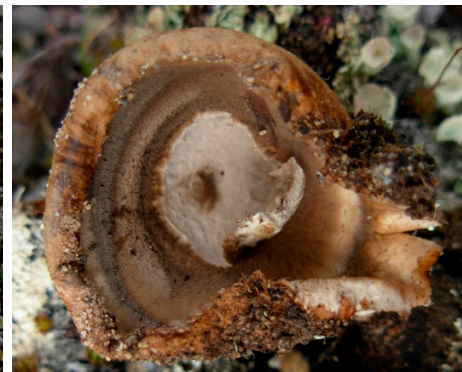

Supplement: s1 [file s1]
