# Supplementary material for: Gišogenetic Variation in White-Spruce (Picea glauca (Moench) Voss) Trees of Yukon Beringia, Canada
Source: MDPI journal article supplement (doi:10.3390/f14040787), 2023-04-11
Supplement: s1 [file s1]

Archive with 9 entries (9 files):
- DATA1311.xlsx
- DATA1316.xlsx
- DATA1320.xlsx
- DATA1326.xlsx
- DATA1328.xlsx
- DATA1329.xlsx
- Figure S1_Mushroom encounters.pdf
- Table S1_EaskForkPlants.xlsx
- TableS2_soilMoisture-pH.xlsx
