# Supplementary material for: Gišogenetic Variation in White-Spruce (Picea glauca (Moench) Voss) Trees of Yukon Beringia, Canada
Source: MDPI journal article supplement (doi:10.3390/f14040787), 2023-04-11
Supplement: s1 [file s1 › DATA1311.xlsx]

## Sheet: NOTE OF 0 m
0 m was not obtained from the field due to the decay in the center.

## Sheet: 1m
	1	2	3	4	5	6	7	8	9	10	11	12	13	14	15	16	17	18	19	20	21	22	23	24	25	26	27	28	29	30	31	32	33	34	35	36	37	38	39	40	41	42	43	44	45	46	47	48	49
Direction	1593	1594	1595	1596	1597	1598	1599	1600	1601	1602	1603	1604	1605	1606	1607	1608	1609	1610	1611	1612	1613	1614	1615	1616	1617	1618	1619	1620	1621	1622	1623	1624	1625	1626	1627	1628	1629	1630	1631	1632	1633	1634	1635	1636	1637	1638	1639	1640	1641
N	1.016	0.69	0.453	0.738	0.484	0.88	0.705	0.754	0.872	0.682	0.167	0.284	0.338	0.316	0.394	0.471	0.394	0.669	0.529	0.616	0.53	0.585	0.624	0.634	0.399	0.336	0.479	0.598	0.534	0.542	0.346	0.361	0.476	0.346	0.376	0.397	0.432	0.33	0.313	0.304	0.419	0.476	0.591	0.588	0.571	1.083	0.972	0.773	0.97
S	0.871	1	0.573	0.403	0.639	0.645	0.552	0.757	0.529	0.34	0.522	0.499	0.269	0.54	0.619	0.643	1.166	0.729	0.758	0.641	0.792	0.681	0.744	0.476	0.468	0.619	0.603	0.476	0.476	0.333	0.365	0.476	0.468	0.492	0.554	0.585	0.536	0.471	0.425	0.668	0.575	0.767	0.65	0.61	0.94	0.804	0.652	0.7	0.48
W	0.865	0.452	0.643	0.656	0.59	0.716	0.442	0.762	0.515	0.302	0.349	0.484	0.381	0.451	0.402	0.338	0.581	0.4	0.456	0.386	0.442	0.418	0.489	0.354	0.331	0.418	0.576	0.404	0.492	0.317	0.349	0.404	0.293	0.381	0.325	0.388	0.341	0.309	0.301	0.411	0.521	0.638	0.506	0.442	0.652	0.662	0.544	0.435	0.389
E	1.103	0.968	0.539	0.642	0.595	0.936	0.786	0.936	0.942	0.748	0.409	0.527	0.535	0.762	0.781	0.799	1.332	0.874	0.795	0.619	0.701	0.749	0.646	0.465	0.529	0.544	0.756	0.623	0.646	0.457	0.378	0.527	0.503	0.473	0.418	0.457	0.37	0.347	0.299	0.504	0.623	0.788	0.631	0.638	0.928	0.98	0.679	0.889	0.409
[truncated: 369 more columns]

## Sheet: 2m
	1	2	3	4	5	6	7	8	9	10	11	12	13	14	15	16	17	18	19	20	21	22	23	24	25	26	27	28	29	30	31	32	33	34	35	36	37	38	39	40	41	42	43	44	45	46	47	48	49
Direction	1616	1617	1618	1619	1620	1621	1622	1623	1624	1625	1626	1627	1628	1629	1630	1631	1632	1633	1634	1635	1636	1637	1638	1639	1640	1641	1642	1643	1644	1645	1646	1647	1648	1649	1650	1651	1652	1653	1654	1655	1656	1657	1658	1659	1660	1661	1662	1663	1664
N	0.611	1.024	0.905	1.047	0.888	1.078	0.559	0.569	0.633	0.532	0.753	0.681	0.539	0.515	0.587	0.507	0.801	0.69	1.23	0.968	1.015	1.205	1.267	0.823	0.816	0.563	0.46	0.633	0.728	0.728	0.577	0.593	0.522	0.687	0.752	0.602	0.722	0.474	0.585	0.482	0.395	0.483	0.521	0.669	0.504	0.56	0.497	0.741	0.465
S	0.643	1.116	0.792	0.831	1.109	0.97	0.621	0.558	0.548	0.624	0.891	0.596	0.589	0.448	0.503	0.378	0.465	0.561	0.946	0.784	0.401	0.931	1.208	0.955	0.912	0.73	0.603	0.599	0.588	0.504	0.53	0.491	0.461	0.591	0.79	0.53	0.616	0.431	0.464	0.502	0.331	0.527	0.537	0.543	0.44	0.479	0.534	0.501	0.429
W	0.564	1.126	0.919	0.96	0.975	0.809	0.507	0.42	0.571	0.633	0.725	0.826	0.76	0.452	0.546	0.515	0.819	0.757	1.081	0.975	0.657	1.012	1.258	0.825	0.888	0.765	0.615	0.679	0.602	0.523	0.578	0.467	0.403	0.668	0.786	0.692	0.595	0.47	0.869	0.59	0.404	0.406	0.439	0.595	0.43	0.39	0.439	0.526	0.401
E	0.572	1.047	0.857	1	0.834	1.072	0.571	0.571	0.675	0.762	0.907	0.733	0.633	0.506	0.525	0.391	0.618	0.587	0.841	0.921	0.594	0.897	1.064	0.825	0.817	0.698	0.468	0.476	0.595	0.516	0.492	0.548	0.46	0.721	0.814	0.545	0.545	0.418	0.512	0.464	0.378	0.426	0.499	0.633	0.451	0.466	0.426	0.64	0.403
[truncated: 345 more columns]

## Sheet: 3m
	1	2	3	4	5	6	7	8	9	10	11	12	13	14	15	16	17	18	19	20	21	22	23	24	25	26	27	28	29	30	31	32	33	34	35	36	37	38	39	40	41	42	43	44	45	46	47	48	49
Direction	1639	1640	1641	1642	1643	1644	1645	1646	1647	1648	1649	1650	1651	1652	1653	1654	1655	1656	1657	1658	1659	1660	1661	1662	1663	1664	1665	1666	1667	1668	1669	1670	1671	1672	1673	1674	1675	1676	1677	1678	1679	1680	1681	1682	1683	1684	1685	1686	1687
N	1.681	1.238	0.508	0.61	0.468	0.618	0.554	0.514	0.616	1.103	1.32	0.865	0.992	0.618	1.002	0.798	0.743	0.912	0.915	0.964	0.997	0.985	0.89	1.001	0.596	0.74	0.853	0.868	0.927	1.068	0.742	0.638	0.662	0.75	0.816	0.677	0.645	0.501	0.591	0.486	0.463	0.516	0.587	0.76	0.72	0.698	0.783	0.649	0.607
S	1.542	1.205	0.521	0.659	0.301	0.502	0.453	0.473	0.516	0.84	1.234	0.842	0.854	0.558	0.973	0.693	0.652	0.654	0.656	0.718	0.562	0.613	0.526	0.665	0.439	0.503	0.494	0.526	0.614	0.596	0.549	0.544	0.676	0.522	0.537	0.539	0.521	0.514	0.522	0.603	0.582	0.51	0.584	0.675	0.733	0.744	0.9	0.683	0.681
W	1.691	1.211	0.547	0.72	0.419	0.774	0.766	0.803	0.919	1.56	2.035	1.352	1.343	0.745	1.552	1.216	1.074	1.234	1.164	1.152	1.026	1.13	0.91	0.956	0.758	0.937	0.941	0.908	0.887	0.78	0.661	0.504	0.766	0.663	0.753	0.679	0.73	0.676	0.715	0.511	0.482	0.511	0.618	0.733	0.668	0.629	0.73	0.551	0.46
E	1.754	1.338	0.562	0.618	0.349	0.508	0.413	0.484	0.594	0.603	0.618	0.72	0.68	0.443	0.822	0.657	0.618	0.737	0.649	0.626	0.626	0.634	0.571	0.611	0.333	0.428	0.492	0.46	0.492	0.395	0.419	0.332	0.403	0.356	0.45	0.466	0.41	0.442	0.496	0.483	0.474	0.459	0.467	0.53	0.571	0.539	0.579	0.476	0.412
[truncated: 322 more columns]

## Sheet: 4m
	1	2	3	4	5	6	7	8	9	10	11	12	13	14	15	16	17	18	19	20	21	22	23	24	25	26	27	28	29	30	31	32	33	34	35	36	37	38	39	40	41	42	43	44	45	46	47	48	49
Direction	1661	1662	1663	1664	1665	1666	1667	1668	1669	1670	1671	1672	1673	1674	1675	1676	1677	1678	1679	1680	1681	1682	1683	1684	1685	1686	1687	1688	1689	1690	1691	1692	1693	1694	1695	1696	1697	1698	1699	1700	1701	1702	1703	1704	1705	1706	1707	1708	1709
N	1.154	0.792	0.713	0.633	0.88	0.919	0.845	0.934	1.118	0.706	0.539	0.856	0.792	0.76	0.713	0.817	0.698	0.698	0.69	0.73	0.762	0.825	0.983	0.944	0.913	0.967	0.729	0.761	0.698	0.794	0.73	0.444	0.54	0.548	0.349	0.73	0.532	0.579	0.492	0.349	0.34	0.261	0.23	0.238	0.206	0.198	0.285	0.294	0.302
S	1.168	0.985	0.757	0.578	0.943	0.855	1.023	1.04	0.976	0.755	0.495	0.834	0.758	0.733	0.666	0.655	0.559	0.54	0.603	0.603	0.695	0.734	1.016	1.079	0.877	0.945	0.649	0.727	0.707	0.979	0.799	0.48	0.726	0.625	0.327	1.08	0.857	0.813	0.457	0.406	0.42	0.286	0.286	0.286	0.307	0.201	0.286	0.267	0.35
W	1.158	0.754	0.563	0.562	0.752	0.798	0.759	0.871	0.975	0.69	0.531	0.88	0.73	0.81	0.651	0.691	0.667	0.635	0.603	0.69	0.643	0.699	0.889	0.881	0.77	0.92	0.666	0.635	0.642	0.976	0.825	0.508	0.666	0.634	0.381	0.793	0.698	0.603	0.508	0.333	0.341	0.246	0.254	0.254	0.19	0.214	0.23	0.278	0.333
E	1.144	0.809	0.642	0.572	0.983	0.794	0.929	1.11	1.213	0.839	0.523	1.399	1.056	0.845	0.751	0.869	0.713	0.713	0.706	0.674	0.936	1	1.087	0.833	0.753	0.832	0.571	0.665	0.766	1.156	0.863	0.53	0.666	0.91	0.594	1.203	0.774	0.703	0.633	0.412	0.508	0.444	0.46	0.476	0.389	0.381	0.389	0.516	0.583
[truncated: 300 more columns]

## Sheet: 5m
	1	2	3	4	5	6	7	8	9	10	11	12	13	14	15	16	17	18	19	20	21	22	23	24	25	26	27	28	29	30	31	32	33	34	35	36	37	38	39	40	41	42	43	44	45	46	47	48	49
Direction	1681	1682	1683	1684	1685	1686	1687	1688	1689	1690	1691	1692	1693	1694	1695	1696	1697	1698	1699	1700	1701	1702	1703	1704	1705	1706	1707	1708	1709	1710	1711	1712	1713	1714	1715	1716	1717	1718	1719	1720	1721	1722	1723	1724	1725	1726	1727	1728	1729
N	0.509	0.396	0.551	0.531	0.904	1.095	1.364	1.198	1.332	1.321	1.107	1.524	0.746	0.873	1.055	0.848	0.764	0.488	0.275	0.15	0.228	0.212	0.378	0.291	0.284	0.229	0.307	0.432	0.449	0.493	0.47	0.405	0.454	0.547	0.598	0.489	0.396	0.31	0.427	0.466	0.474	0.658	0.483	0.438	0.53	0.654	0.525	0.634	0.511
S	0.539	0.363	0.427	0.49	0.672	0.855	1.037	0.871	0.98	1.023	0.865	1.045	1.251	0.751	1.189	0.736	0.61	0.317	0.373	0.396	0.317	0.286	0.254	0.151	0.198	0.222	0.317	0.381	0.476	0.341	0.357	0.413	0.349	0.444	0.381	0.286	0.413	0.445	0.413	0.421	0.563	0.46	0.445	0.492	0.626	0.678	0.582	0.649	0.886
W	0.466	0.393	0.416	0.42	0.833	1.148	1.301	1.198	1.33	1.367	0.907	1.45	1.632	0.866	1.229	0.955	0.699	0.337	0.221	0.331	0.229	0.269	0.292	0.237	0.15	0.269	0.355	0.41	0.487	0.314	0.235	0.36	0.234	0.36	0.329	0.275	0.252	0.369	0.426	0.46	0.529	0.398	0.421	0.46	0.577	0.579	0.407	0.385	0.55
E	0.482	0.249	0.444	0.448	0.637	0.801	1.107	1.04	1.138	1.172	0.965	1.195	1.385	0.759	1.079	0.698	0.522	0.356	0.246	0.277	0.278	0.365	0.317	0.286	0.262	0.278	0.341	0.357	0.389	0.325	0.381	0.404	0.294	0.381	0.349	0.278	0.381	0.42	0.357	0.404	0.514	0.419	0.396	0.435	0.546	0.539	0.474	0.537	0.788
[truncated: 280 more columns]

## Sheet: 6m
	1	2	3	4	5	6	7	8	9	10	11	12	13	14	15	16	17	18	19	20	21	22	23	24	25	26	27	28	29	30	31	32	33	34	35	36	37	38	39	40	41	42	43	44	45	46	47	48	49
Direction	1717	1718	1719	1720	1721	1722	1723	1724	1725	1726	1727	1728	1729	1730	1731	1732	1733	1734	1735	1736	1737	1738	1739	1740	1741	1742	1743	1744	1745	1746	1747	1748	1749	1750	1751	1752	1753	1754	1755	1756	1757	1758	1759	1760	1761	1762	1763	1764	1765
N	0.611	0.151	0.226	0.302	0.603	0.758	0.646	0.575	0.376	0.423	0.652	0.477	0.824	0.852	0.588	0.512	0.368	0.436	0.372	0.504	0.375	0.449	0.412	0.408	0.308	0.294	0.271	0.303	0.358	0.299	0.271	0.301	0.331	0.271	0.301	0.301	0.211	0.241	0.246	0.137	0.252	0.198	0.222	0.241	0.269	0.281	0.167	0.174	0.219
S	0.635	0.175	0.532	0.286	0.849	1.233	1.496	1.965	2.027	1.759	1.526	1.355	1.776	1.395	1.183	0.603	0.632	0.867	0.534	0.759	0.584	0.584	0.492	0.557	0.414	0.394	0.388	0.35	0.505	0.362	0.454	0.483	0.483	0.491	0.419	0.305	0.285	0.325	0.243	0.204	0.365	0.383	0.344	0.338	0.39	0.339	0.246	0.232	0.327
W	0.678	0.19	0.397	0.143	0.222	0.737	1.005	0.913	1.148	1.26	1.273	1.175	0.882	0.973	0.894	0.625	0.616	0.461	0.586	0.441	0.664	0.525	0.624	0.632	0.549	0.477	0.473	0.434	0.437	0.52	0.39	0.354	0.474	0.507	0.427	0.526	0.496	0.47	0.284	0.306	0.197	0.325	0.34	0.314	0.376	0.416	0.329	0.26	0.239
E	0.638	0.175	0.245	0.317	0.526	0.9	0.764	0.66	0.489	0.696	0.703	0.641	0.792	0.678	0.608	0.492	0.286	0.302	0.223	0.375	0.329	0.384	0.413	0.34	0.269	0.253	0.267	0.254	0.301	0.213	0.246	0.269	0.303	0.276	0.263	0.267	0.238	0.207	0.249	0.13	0.284	0.2	0.269	0.288	0.281	0.305	0.194	0.19	0.217
[truncated: 244 more columns]

## Sheet: 7m
This disk is measured by microscope
	1	2	3	4	5	6	7	8	9	10	11	12	13	14	15	16	17	18	19	20	21	22	23	24	25	26	27	28	29	30	31	32	33	34	35	36	37	38	39	40	41	42	43	44	45	46	47	48	49
Direction	1760	1761	1762	1763	1764	1765	1766	1767	1768	1769	1770	1771	1772	1773	1774	1775	1776	1777	1778	1779	1780	1781	1782	1783	1784	1785	1786	1787	1788	1789	1790	1791	1792	1793	1794	1795	1796	1797	1798	1799	1800	1801	1802	1803	1804	1805	1806	1807	1808
N	0.3465	0.1995	0.252	0.546	0.294	0.2835	0.189	0.168	0.126	0.189	0.189	0.21	0.21	0.231	0.3045	0.462	0.483	0.6825	0.7875	0.609	0.546	0.651	0.399	0.357	0.336	0.273	0.294	0.378	0.42	0.42	0.2415	0.2415	0.273	0.1575	0.2415	0.2415	0.273	0.3045	0.294	0.315	0.21	0.231	0.147	0.189	0.168	0.189	0.21	0.189	0.168
S	0.315	0.21	0.231	0.588	0.273	0.3255	0.336	0.252	0.189	0.168	0.21	0.252	0.294	0.357	0.483	0.546	0.651	0.903	0.84	0.714	0.5565	0.7035	0.42	0.399	0.357	0.2835	0.2835	0.315	0.315	0.357	0.1785	0.2415	0.252	0.1575	0.168	0.1575	0.1575	0.1575	0.147	0.189	0.126	0.168	0.147	0.231	0.252	0.2835	0.2835	0.231	0.21
W	0.462	0.21	0.2415	0.546	0.2835	0.3045	0.294	0.2415	0.2415	0.168	0.231	0.357	0.294	0.357	0.483	0.525	0.735	1.1025	1.029	1.029	0.924	1.029	0.651	0.672	0.525	0.4935	0.546	0.672	0.7245	0.798	0.336	0.441	0.4305	0.21	0.21	0.252	0.315	0.294	0.252	0.294	0.273	0.231	0.189	0.315	0.357	0.378	0.399	0.483	0.2415
E	0.378	0.21	0.2205	0.609	0.5145	0.273	0.21	0.21	0.1155	0.1995	0.189	0.2205	0.231	0.273	0.336	0.42	0.399	0.504	0.567	0.588	0.483	0.546	0.3675	0.3465	0.336	0.2835	0.294	0.336	0.3255	0.294	0.168	0.1575	0.2205	0.1365	0.147	0.1155	0.1575	0.1575	0.147	0.189	0.147	0.189	0.1575	0.2415	0.189	0.189	0.2415	0.1575	0.1575
[truncated: 200 more columns]

## Sheet: 8 m
This disk is measured by microscope
	1	2	3	4	5	6	7	8	9	10	11	12	13	14	15	16	17	18	19	20	21	22	23	24	25	26	27	28	29	30	31	32	33	34	35	36	37	38	39	40	41	42	43	44	45	46	47	48	49
Direction	1822	1823	1824	1825	1826	1827	1828	1829	1830	1831	1832	1833	1834	1835	1836	1837	1838	1839	1840	1841	1842	1843	1844	1845	1846	1847	1848	1849	1850	1851	1852	1853	1854	1855	1856	1857	1858	1859	1860	1861	1862	1863	1864	1865	1866	1867	1868	1869	1870
N	0.798	0.231	0.21	0.147	0.21	0.294	0.3255	0.189	0.189	0.2415	0.1575	0.1155	0.1365	0.0945	0.147	0.1155	0.105	0.0945	0.147	0.147	0.1995	0.1785	0.126	0.1575	0.2415	0.1995	0.1785	0.21	0.21	0.126	0.084	0.084	0.084	0.084	0.126	0.147	0.168	0.1365	0.1365	0.1575	0.1155	0.1155	0.1155	0.1155	0.0945	0.0735	0.0945	0.063	0.105
S	1.05	0.315	0.2415	0.1785	0.231	0.3465	0.2835	0.273	0.252	0.2625	0.168	0.1995	0.1995	0.189	0.42	0.189	0.147	0.252	0.231	0.252	0.189	0.1365	0.126	0.1785	0.21	0.168	0.1785	0.168	0.147	0.105	0.084	0.1365	0.126	0.189	0.1785	0.1365	0.1575	0.126	0.1365	0.126	0.1365	0.1365	0.168	0.1575	0.126	0.1155	0.126	0.1365	0.126
W	0.945	0.315	0.231	0.21	0.231	0.315	0.231	0.168	0.2205	0.147	0.147	0.168	0.147	0.189	0.168	0.1365	0.1575	0.2205	0.2205	0.273	0.2205	0.1575	0.1365	0.231	0.21	0.168	0.1995	0.1995	0.147	0.105	0.1155	0.126	0.126	0.1785	0.1785	0.1575	0.147	0.1365	0.147	0.147	0.1365	0.1155	0.1155	0.147	0.105	0.126	0.0945	0.105	0.1155
E	0.945	0.336	0.252	0.1995	0.378	0.4515	0.273	0.273	0.1575	0.1785	0.168	0.2205	0.1995	0.3045	0.105	0.1995	0.168	0.273	0.21	0.2835	0.252	0.168	0.147	0.2415	0.2625	0.1995	0.231	0.1785	0.1365	0.0735	0.0735	0.105	0.105	0.147	0.189	0.1365	0.147	0.1365	0.1365	0.126	0.105	0.1155	0.147	0.1365	0.084	0.105	0.084	0.0945	0.0945
	0.9345	0.29925	0.233625	0.18375	0.2625	0.35175	0.27825	0.22575	0.20475	0.207375	0.160125	0.175875	0.170625	0.19425	0.21	0.160125	0.144375	0.21	0.202125	0.238875	0.21525	0.160125	0.133875	0.202125	0.231	0.18375	0.196875	0.189	0.160125	0.102375	0.08925	0.112875	0.11025	0.149625	0.168	0.144375	0.154875	0.133875	0.139125	0.139125	0.123375	0.12075	0.1365	0.139125	0.102375	0.105	0.09975	0.09975	0.11025
[truncated: 138 more columns]

## Sheet: top
This disk is measured by microscope
	1	2	3	4	5	6	7	8	9	10
	1999	2000	2001	2002	2003	2004	2005	2006	2007	2008
1	0.42	0.168	0.1995	0.147	0.294	0.2835	0.4515	0.0525	0.1575	0.0945
2	0.357	0.189	0.168	0.168	0.378	0.273	0.42	0.1785	0.1365	0.315
3	0.546	0.126	0.168	0.189	0.357	0.399	0.756	0.231	0.1785	0.378
4	0.483	0.147	0.189	0.1575	0.273	0.357	0.4725	0.2835	0.147	0.231

[truncated: 1 more sheets: Sheet1]
