# Supplementary material for: Gišogenetic Variation in White-Spruce (Picea glauca (Moench) Voss) Trees of Yukon Beringia, Canada
Source: MDPI journal article supplement (doi:10.3390/f14040787), 2023-04-11
Supplement: s1 [file s1 › DATA1316.xlsx]

## Sheet: 0 m
	1	2	3	4	5	6	7	8	9	10	11	12	13	14	15	16	17	18	19	20	21	22	23	24	25	26	27	28	29	30	31	32	33	34	35	36	37	38	39	40	41	42	43	44	45	46	47	48	49
	1733	1734	1735	1736	1737	1738	1739	1740	1741	1742	1743	1744	1745	1746	1747	1748	1749	1750	1751	1752	1753	1754	1755	1756	1757	1758	1759	1760	1761	1762	1763	1764	1765	1766	1767	1768	1769	1770	1771	1772	1773	1774	1775	1776	1777	1778	1779	1780	1781
N	0.4	0.3	0.4	0.5	0.4	0.2	0.2	0.15	0.3	0.15	0.15	0.15	0.15	0.219	0.389	0.421	0.356	0.353	0.354	0.436	0.475	0.68	0.45	0.484	0.532	0.491	0.396	0.562	0.762	0.553	0.488	0.698	0.817	0.619	0.555	0.626	0.928	0.659	0.865	0.77	0.841	1.157	1.185	0.801	0.697	0.619	0.809	0.818	0.873
S	0.5	0.4	0.4	0.35	0.4	0.3	0.3	0.3	0.3	0.27	0.278	0.333	0.175	0.238	0.238	0.444	0.365	0.373	0.405	0.437	0.468	0.556	0.54	0.381	0.524	0.508	0.595	0.452	0.762	0.802	0.571	0.54	0.698	0.659	0.643	0.651	0.818	1.254	0.691	0.818	0.706	0.77	0.881	1.119	0.857	1.016	0.73	0.619	0.77
W	0.4	0.3	0.3	0.25	0.4	0.2	0.207	0.238	0.325	0.246	0.198	0.365	0.333	0.389	0.619	0.434	0.368	0.456	0.399	0.561	0.537	0.787	0.504	0.682	0.671	0.639	0.5	0.691	0.912	0.609	0.572	0.842	0.788	0.677	0.642	0.717	1.042	0.885	0.92	0.88	0.927	1.048	0.99	0.888	0.878	0.697	0.81	0.884	0.552
E	0.3	0.3	0.25	0.35	0.3	0.2	0.15	0.2	0.25	0.182	0.171	0.168	0.154	0.212	0.273	0.338	0.369	0.387	0.299	0.339	0.36	0.52	0.794	0.467	0.476	0.553	0.394	0.342	0.481	0.531	0.529	0.503	0.615	0.623	0.559	0.702	0.771	0.998	0.651	0.82	0.71	0.844	0.872	0.823	0.75	0.727	0.61	0.498	0.584
[truncated: 227 more columns]

## Sheet: 1m
	1	2	3	4	5	6	7	8	9	10	11	12	13	14	15	16	17	18	19	20	21	22	23	24	25	26	27	28	29	30	31	32	33	34	35	36	37	38	39	40	41	42	43	44	45	46	47	48	49
Direction	1761	1762	1763	1764	1765	1766	1767	1768	1769	1770	1771	1772	1773	1774	1775	1776	1777	1778	1779	1780	1781	1782	1783	1784	1785	1786	1787	1788	1789	1790	1791	1792	1793	1794	1795	1796	1797	1798	1799	1800	1801	1802	1803	1804	1805	1806	1807	1808	1809
N	2.226	0.877	1	1.002	0.795	0.925	0.897	0.754	0.912	1.04	1.412	1.063	0.976	1.053	1.069	1.372	1.325	0.952	0.876	0.695	0.817	0.992	0.69	0.46	0.563	0.603	0.794	0.603	0.468	0.618	0.642	0.73	0.619	0.643	0.849	0.873	0.754	0.738	0.738	0.825	1.016	0.666	0.611	0.746	0.857	0.817	0.738	0.913	0.951
S	2.35	0.807	1.056	0.888	0.788	1.003	0.875	0.733	1.03	0.941	1.232	0.897	1.024	0.952	1.047	0.99	1.145	0.919	0.872	0.762	0.676	0.772	0.757	0.609	0.696	0.79	0.728	0.72	0.524	0.397	0.404	0.548	0.603	0.579	0.635	0.643	0.556	0.627	0.579	0.681	0.705	0.713	0.595	0.704	0.901	0.911	0.64	0.631	0.708
W	1.913	0.69	1.032	0.944	0.825	1.055	0.849	0.722	0.976	1.047	1.373	1.064	1.143	1.063	1.206	1.302	1.111	0.881	0.833	0.571	0.603	0.729	0.738	0.468	0.729	0.761	0.999	0.912	0.69	0.603	0.539	0.729	0.793	0.698	0.928	0.945	0.952	0.746	0.777	0.856	1.013	0.728	0.665	0.823	0.918	1.013	0.695	0.885	0.759
E	2.893	0.512	0.489	0.857	0.865	1.193	1.041	0.834	0.839	1.046	1.259	1.048	0.944	0.912	1.056	1.09	1.09	0.799	0.823	0.788	0.742	0.632	0.536	0.508	0.825	0.826	0.794	0.769	0.723	0.688	0.455	0.688	0.663	0.714	1.043	0.907	0.647	0.544	0.603	0.74	1.002	0.621	0.751	0.826	0.787	0.8	0.571	0.825	0.952
[truncated: 199 more columns]

## Sheet: 2m
	1	2	3	4	5	6	7	8	9	10	11	12	13	14	15	16	17	18	19	20	21	22	23	24	25	26	27	28	29	30	31	32	33	34	35	36	37	38	39	40	41	42	43	44	45	46	47	48	49
Direction	1770	1771	1772	1773	1774	1775	1776	1777	1778	1779	1780	1781	1782	1783	1784	1785	1786	1787	1788	1789	1790	1791	1792	1793	1794	1795	1796	1797	1798	1799	1800	1801	1802	1803	1804	1805	1806	1807	1808	1809	1810	1811	1812	1813	1814	1815	1816	1817	1818
N	1.453	1.04	1.325	1.356	1.33	1.488	1.292	1.174	0.912	0.738	0.818	0.794	0.778	0.651	0.5	0.92	0.825	0.754	0.571	0.516	0.698	0.69	0.649	0.655	0.694	0.962	0.88	0.864	0.859	0.731	0.833	1.088	0.859	0.821	0.864	0.809	0.848	0.72	0.956	0.95	0.824	0.897	0.658	0.798	0.593	0.632	0.764	0.648	0.805
S	1.587	1.124	1.166	1.261	1.348	1.538	1.579	1.357	1.31	1.262	0.88	1.103	1.293	0.888	0.516	0.968	0.889	1.063	0.81	0.651	0.556	0.532	0.721	0.69	0.714	0.769	0.769	0.752	0.641	0.641	0.785	0.838	0.679	0.663	0.724	0.869	0.977	0.639	0.749	0.814	0.678	0.851	0.694	0.914	0.672	0.594	0.845	0.569	0.829
W	2.397	1.186	1.227	1.354	1.552	1.54	1.564	1.485	1.174	0.983	0.919	1.031	0.936	0.825	0.658	1.148	1.075	1.122	0.817	0.607	0.664	0.618	0.752	0.6	0.66	0.817	0.943	0.969	0.766	0.822	0.887	0.92	0.727	0.694	0.845	0.939	1.219	0.873	1.216	1.194	0.909	0.904	0.722	0.946	0.684	0.571	0.811	0.592	0.842
E	2	1.088	1.339	1.304	1.393	1.49	1.393	1.132	1.014	1.079	0.794	0.556	0.936	0.849	0.619	1.072	0.873	0.825	0.722	0.524	0.389	0.476	0.564	0.651	0.555	0.564	0.603	0.698	0.619	0.571	0.651	0.762	0.602	0.481	0.554	0.817	0.783	0.542	0.607	0.603	0.603	0.607	0.522	0.582	0.502	0.482	0.607	0.422	0.533
[truncated: 190 more columns]

## Sheet: 3m
Direction	1776	1777	1778	1779	1780	1781	1782	1783	1784	1785	1786	1787	1788	1789	1790	1791	1792	1793	1794	1795	1796	1797	1798	1799	1800	1801	1802	1803	1804	1805	1806	1807	1808	1809	1810	1811	1812	1813	1814	1815	1816	1817	1818	1819	1820	1821	1822	1823	1824
N	1.537	1.169	1.142	1.141	0.856	1.016	0.968	1.064	1.111	1.413	1.111	1.032	0.84	0.777	0.745	0.587	0.714	0.683	0.73	0.73	0.746	0.666	0.667	0.603	0.572	0.81	0.619	0.666	0.825	0.872	0.919	0.713	0.934	1.013	0.951	1.029	0.618	0.714	0.665	0.585	0.839	0.537	0.776	0.745	0.902	0.665	0.618	0.695	0.678
S	1.635	1.175	1.175	1.222	1.096	1.175	1.175	1.064	0.873	1.191	1.048	1.143	0.889	0.603	0.619	0.524	0.651	0.667	0.73	0.81	0.778	0.81	0.794	0.698	0.826	0.984	0.802	0.786	0.889	0.953	1.143	0.73	0.746	0.667	0.54	0.667	0.556	0.826	0.508	0.54	0.794	0.556	0.73	0.683	0.746	0.619	0.572	0.714	0.873
W	1.368	1.155	1.08	1.079	0.952	1.095	1.047	0.952	0.983	1.506	1.158	1.079	0.792	0.728	0.871	0.744	0.825	0.761	0.792	0.983	0.888	0.888	0.809	0.682	0.825	1.016	0.778	0.81	0.953	0.953	1.111	0.841	1.079	1.032	0.841	0.937	0.698	0.984	0.714	0.571	0.746	0.587	0.778	0.841	1	0.889	0.825	0.968	0.889
E	1.412	0.968	1.173	1.11	0.966	1.027	1.129	1.06	1.029	1.189	1.108	0.893	0.708	1.029	0.872	0.714	0.729	0.841	0.698	1	0.873	0.889	0.714	0.571	0.697	0.761	0.555	0.681	0.681	0.79	0.932	0.584	0.615	0.662	0.599	0.901	0.63	0.711	0.52	0.49	0.773	0.443	0.666	0.571	0.823	0.571	0.54	0.666	0.54
[truncated: 184 more columns]

## Sheet: 4m
Direction	1784	1785	1786	1787	1788	1789	1790	1791	1792	1793	1794	1795	1796	1797	1798	1799	1800	1801	1802	1803	1804	1805	1806	1807	1808	1809	1810	1811	1812	1813	1814	1815	1816	1817	1818	1819	1820	1821	1822	1823	1824	1825	1826	1827	1828	1829	1830	1831	1832
N	1.921	1.166	1.032	1.015	1.039	0.849	0.81	0.627	0.77	0.746	0.778	1.008	0.808	0.832	0.769	0.754	0.825	0.905	0.675	0.754	0.778	0.738	0.762	0.595	0.857	0.778	0.714	0.792	0.586	0.713	0.578	0.522	0.821	0.515	0.735	0.776	0.725	0.701	0.716	0.867	0.838	0.641	0.737	0.666	0.865	0.754	0.468	0.579	0.786
S	2.145	1.054	0.991	1.324	0.972	0.934	0.944	0.753	0.983	1.016	0.928	0.958	0.872	1.045	0.855	0.8	0.91	1.039	0.879	0.913	1.19	1.159	1.23	0.786	0.952	0.865	0.706	0.897	0.659	0.936	0.683	0.587	0.778	0.572	0.817	0.982	0.988	0.6	0.646	0.677	0.739	0.741	0.694	0.664	0.725	0.726	0.583	0.616	0.853
W	2.058	1.021	0.913	1.087	0.984	0.889	0.857	0.643	0.936	0.99	0.903	1.053	0.92	0.897	0.825	0.77	0.762	1.031	0.831	0.896	1.037	1.118	1.283	0.847	1.045	0.893	0.8	0.886	0.633	0.956	0.657	0.633	0.848	0.546	0.761	0.92	1.045	0.888	0.918	1.014	0.888	0.792	0.887	0.792	0.822	0.758	0.569	0.719	0.939
E	2.317	1.278	1.151	1.217	1.156	0.95	0.817	0.784	0.888	0.92	0.951	1.047	0.848	0.849	0.777	0.721	0.864	1.045	0.776	0.936	0.887	0.914	0.877	0.542	0.775	0.613	0.489	0.655	0.476	0.663	0.501	0.596	0.739	0.454	0.817	0.776	0.869	0.654	0.53	0.59	0.532	0.456	0.552	0.466	0.545	0.538	0.309	0.435	0.459
[truncated: 176 more columns]

## Sheet: 5m
Direction	1792	1793	1794	1795	1796	1797	1798	1799	1800	1801	1802	1803	1804	1805	1806	1807	1808	1809	1810	1811	1812	1813	1814	1815	1816	1817	1818	1819	1820	1821	1822	1823	1824	1825	1826	1827	1828	1829	1830	1831	1832	1833	1834	1835	1836	1837	1838	1839	1840
N	1.666	0.444	0.873	1.185	0.934	1.006	1.173	0.848	1.095	1.521	1.14	1.142	1.468	1.158	0.873	0.556	0.873	0.754	0.642	0.706	0.523	0.681	0.585	0.538	0.741	0.416	0.655	0.725	0.733	0.634	0.666	0.786	0.754	0.561	0.647	0.61	0.705	0.526	0.33	0.44	0.581	0.786	0.629	0.543	0.597	0.575	0.701	0.677	0.81
S	1.73	0.563	0.944	1.238	1.008	1.173	1.015	0.841	1.024	1.206	1.102	1.142	1.5	1.198	1.048	0.706	1.04	0.921	0.786	0.865	0.698	0.984	0.698	0.57	0.739	0.493	0.679	0.703	0.726	0.522	0.484	0.607	0.687	0.753	0.698	0.869	1.12	1.088	0.706	0.691	0.857	0.913	0.794	0.619	0.786	0.706	0.95	0.727	0.822
W	1.766	0.445	0.896	1.245	0.967	1.021	1.077	1.029	1.13	1.415	1.042	1.004	1.368	1.094	0.999	0.841	1.159	1.014	0.833	0.841	0.658	0.92	0.768	0.623	0.83	0.49	0.813	0.871	0.867	0.731	0.828	0.779	0.699	0.574	0.575	0.584	0.647	0.554	0.428	0.554	0.745	0.889	0.713	0.627	0.815	0.814	0.893	0.853	0.996
E	1.738	0.444	0.865	1.114	1.024	1.103	1.095	0.754	1.19	1.174	1.084	1.036	1.423	1.233	1.012	0.633	0.887	0.823	0.633	0.728	0.57	0.822	0.568	0.568	0.727	0.41	0.632	0.662	0.695	0.632	0.538	0.728	0.633	0.57	0.568	0.506	0.695	0.633	0.412	0.569	0.694	0.886	0.697	0.57	0.79	0.537	0.695	0.569	0.757
[truncated: 168 more columns]

## Sheet: 6m
Direction	1802	1803	1804	1805	1806	1807	1808	1809	1810	1811	1812	1813	1814	1815	1816	1817	1818	1819	1820	1821	1822	1823	1824	1825	1826	1827	1828	1829	1830	1831	1832	1833	1834	1835	1836	1837	1838	1839	1840	1841	1842	1843	1844	1845	1846	1847	1848	1849	1850
N	2.479	1.03	1.251	1.17	0.8	0.853	1.151	1.002	0.592	0.526	0.688	0.909	0.579	0.445	0.601	0.47	0.701	0.638	0.713	0.532	0.62	0.635	0.626	0.675	0.638	0.57	0.722	0.557	0.464	0.483	0.529	0.809	0.672	0.445	0.451	0.548	0.619	0.681	0.711	0.689	0.6	0.734	1.059	0.826	1.064	0.966	1.282	0.725	0.772
S	2.618	1.031	1.768	1.432	1.292	1.155	1.659	1.196	0.75	0.794	0.881	1.258	0.688	0.458	0.825	0.564	0.769	0.697	0.738	0.704	0.666	0.732	0.713	0.629	0.713	0.607	0.601	0.591	0.467	0.402	0.822	0.896	0.798	0.66	0.834	0.713	0.953	0.918	1.083	0.962	0.934	0.856	1.32	0.837	1.196	1.062	1.432	0.828	1.006
W (this radial series was measured by microscope)	2.52	1.071	1.659	1.323	1.029	1.071	1.533	1.26	0.714	0.63	0.714	0.966	0.546	0.4305	0.693	0.4305	0.588	0.63	0.5985	0.5775	0.63	0.756	0.798	0.63	0.84	0.777	0.777	0.63	0.462	0.567	0.861	1.008	0.798	0.63	0.861	0.861	1.029	0.756	0.987	1.008	0.84	0.84	1.155	0.882	1.05	0.945	1.3335	0.7875	0.9765
E	2.142	0.935	1.474	1.347	0.745	0.936	1.327	1.113	0.676	0.673	0.658	1.039	0.613	0.455	0.66	0.505	0.817	0.694	0.694	0.631	0.487	0.551	0.714	0.664	0.696	0.57	0.854	0.681	0.396	0.492	0.633	0.951	0.667	0.65	0.745	0.681	0.774	0.679	0.827	0.785	0.806	0.727	0.995	0.742	0.948	0.855	1.219	0.697	0.841
[truncated: 158 more columns]

## Sheet: 7m
Direction	1821	1822	1823	1824	1825	1826	1827	1828	1829	1830	1831	1832	1833	1834	1835	1836	1837	1838	1839	1840	1841	1842	1843	1844	1845	1846	1847	1848	1849	1850	1851	1852	1853	1854	1855	1856	1857	1858	1859	1860	1861	1862	1863	1864	1865	1866	1867	1868	1869
N	1.383	1.062	0.953	1.095	1.349	1.349	0.778	1.079	1.27	0.572	0.857	0.984	1.158	1.159	0.833	1.04	1.127	1.476	1.087	1.215	1.127	0.794	0.889	1.111	0.921	1.413	1.238	1.985	0.873	1.071	1.246	1.342	1.04	1.31	1.341	0.952	1.016	1.905	1.286	1.413	1.143	1.079	1.302	1.031	1.159	1.048	1.024	0.961	1.032
S	1.494	0.977	1.144	1.116	1.208	1.207	0.663	0.992	1.141	0.567	0.711	0.839	1.031	1.013	0.789	1.069	1.045	1.219	1.016	1.111	1.175	1.088	1.166	1.657	1.188	1.311	1.1	1.367	0.834	1.021	1.142	1.08	0.825	1.047	1.048	0.821	0.893	1.068	0.827	0.962	0.731	0.998	1.034	0.809	1.001	0.951	0.89	0.73	0.81
W	1.484	0.976	0.929	1.072	1.262	1.246	0.722	1.151	1.246	0.714	0.81	0.889	1.151	1.048	0.786	1.183	1.159	1.476	1.214	1.405	1.246	0.984	1.103	1.453	1.064	1.421	1.183	1.318	0.833	0.968	1.151	1.238	0.849	1.516	1.468	0.976	0.921	1.373	1.048	1.048	0.952	1.143	1.191	0.794	0.857	0.953	0.762	0.603	0.595
E	1.39	1.029	1.077	0.965	1.276	1.184	0.667	0.952	1.175	0.857	0.807	1.035	1.238	1.043	1.065	1.133	1.141	1.365	1.048	1.079	1.229	0.999	1.105	1.429	1.048	1.644	1.15	1.651	0.953	1.334	1.397	1.238	1.08	1.175	1.373	1.096	1.211	1.379	1.055	1.347	1.122	1.242	1.105	0.95	1.043	1.093	1.023	0.996	0.781
[truncated: 139 more columns]

## Sheet: 8m
Direction	1832	1833	1834	1835	1836	1837	1838	1839	1840	1841	1842	1843	1844	1845	1846	1847	1848	1849	1850	1851	1852	1853	1854	1855	1856	1857	1858	1859	1860	1861	1862	1863	1864	1865	1866	1867	1868	1869	1870	1871	1872	1873	1874	1875	1876	1877	1878	1879	1880
N	1.421	0.895	0.951	0.792	0.999	1.048	1.42	1.381	1.595	1.619	1.174	1.213	1.959	1.619	1.492	1.389	1.563	1.182	1.221	1.127	1.316	1.054	1.457	1.462	0.889	1.229	1.658	1.262	1.585	1.083	1.185	1.043	0.977	1.17	0.998	0.835	0.615	0.806	0.783	0.828	0.861	1.074	0.901	1.098	1.122	1.053	0.982	0.916	0.665
S	1.316	0.872	1.126	0.794	1.032	1.048	1.516	1.31	1.619	1.556	1.238	1.111	1.841	1.659	1.642	1.452	1.881	1.334	1.306	1.298	1.34	1.111	1.437	1.564	1.095	1.262	1.461	1.182	1.476	1.111	1.127	1.269	0.896	0.983	0.991	0.888	0.666	0.785	0.832	0.736	0.936	0.738	0.643	0.841	0.848	0.847	0.879	0.768	0.642
W	1.682	0.937	1.135	0.722	0.921	0.984	1.357	1.15	1.427	1.46	1.063	0.984	2	1.476	1.587	1.397	1.586	1.077	1.141	1.205	1.359	1.138	1.362	1.454	0.947	1.135	1.485	1.135	1.235	1.045	1.045	1.103	0.917	1.169	1.108	1.235	0.951	1.013	0.982	0.885	0.918	0.887	0.856	0.888	0.864	0.817	0.823	0.825	0.635
E	1.675	0.888	1.046	0.809	0.976	1.143	1.635	1.373	1.647	1.659	1.28	1.177	1.993	1.579	1.438	1.465	1.807	1.205	1.286	1.246	1.111	0.857	1.103	1.064	0.762	1.016	1.206	0.857	1.023	0.937	0.992	1.016	0.698	1.047	1.047	1.047	0.706	0.706	0.746	0.658	0.77	0.674	0.667	0.706	0.801	0.642	0.698	0.698	0.524
[truncated: 128 more columns]

## Sheet: 9m
Direction	1844	1845	1846	1847	1848	1849	1850	1851	1852	1853	1854	1855	1856	1857	1858	1859	1860	1861	1862	1863	1864	1865	1866	1867	1868	1869	1870	1871	1872	1873	1874	1875	1876	1877	1878	1879	1880	1881	1882	1883	1884	1885	1886	1887	1888	1889	1890	1891	1892
N	1.89	1.065	1.597	1.127	1.7	1.274	0.638	1.085	1.196	0.817	1.096	0.927	1.367	1.157	1.8	1.21	1.853	1.474	1.135	1.12	0.964	0.941	0.788	0.702	0.743	1.002	0.931	0.687	0.856	0.754	0.529	0.512	0.77	0.719	0.386	0.485	0.358	0.455	0.569	0.375	0.631	0.631	0.682	0.568	0.798	0.814	1.048	1.046	0.878
S	2.095	0.801	1.397	1.277	2.702	2.119	1.511	1.798	1.905	1.815	2.413	2.02	1.265	1.329	1.809	1.498	1.936	1.253	1.435	1.603	1.333	1.365	1.244	1.309	0.916	1.076	1.112	0.829	0.983	0.927	0.772	0.807	1.061	0.78	0.893	0.841	0.621	0.683	0.76	0.723	0.814	0.783	0.783	0.534	0.783	0.565	0.873	0.783	0.61
W	2.188	1.142	1.732	1.528	2.154	1.521	1.11	1.237	1.395	1.207	1.365	1.397	1.016	1.119	1.357	1.151	1.488	1.191	0.998	0.957	0.849	0.905	0.778	0.88	0.762	0.887	0.853	0.82	0.977	1.108	0.888	0.95	1.016	0.921	0.856	0.849	0.643	0.887	0.92	0.762	0.793	0.905	0.841	0.633	0.921	0.714	0.958	0.936	0.846
E	2.012	1.022	1.523	1.405	2.15	1.871	1.076	1.313	1.32	1.22	1.398	1.205	0.958	1.216	1.284	1.156	1.31	1.296	1.308	1.281	0.951	1.171	0.982	1.212	0.787	0.841	0.959	1.143	1.036	0.881	0.899	0.907	0.907	0.837	0.743	0.72	0.546	0.792	0.934	0.586	0.681	0.886	0.695	0.474	0.789	0.575	0.78	0.77	0.778
[truncated: 116 more columns]

[truncated: 7 more sheets: 10m, 11m, 12m, 13 m, 14 m, 15 m, 16 m]
