# Supplementary material for: Gišogenetic Variation in White-Spruce (Picea glauca (Moench) Voss) Trees of Yukon Beringia, Canada
Source: MDPI journal article supplement (doi:10.3390/f14040787), 2023-04-11
Supplement: s1 [file s1 › Table S1_EaskForkPlants.xlsx]

## Sheet: vascularPlants
Supplemental Table 2: Vascular plants of the Mount Nansen locale
Specimen name	collection date	WGS 84 coordinates
		Lat.	Long.
Achillea millefolium	2008-07-06	62.0543	137.158
Aconitum delphinifolium	2008-07-05	62.0763	137.156
Aconitum delphinifolium	2008-07-04	62.118	137.203
Acrostis scabra	2008-07-12	62.1082	137.205
Acrostis scabra	2008-07-12	62.1082	137.205
Acrostis scabra	2008-07-12	62.1098	137.204
Androsace chamaejasme ssp. lehmanniana	2008-07-01	62.0595	137.157
Androsace septentrionalis	2008-07-05	62.0664	137.16
Anemone parviflora	2008-07-01	62.0595	137.157
Anemone parviflora	2008-07-04	62.118	137.202
Anemone parviflora	2008-06-30	62.1302	137.271
Anemone parviflora	2008-07-02	62.0727	137.167
Anemone richardsonii	2008-07-04	62.118	137.202
Antennaria monocephala	2008-07-02	62.072	137.166
Antennaria rosea	2008-07-05	62.074	137.162
Arabis kamchatica	2008-07-11	62.025	137.057
Arctagrostis latifolia	2008-07-07	62.1127	137.211
Arctagrostis latifolia	2008-07-10	62.1059	137.197
Arctostaphylos rubra	2008-07-28	62.1299	137.268
Arnica griscomii ssp. frigida	2008-07-01	62.0595	137.157
Arnica griscomii ssp. frigida	2008-07-14	62.0786	137.152
Arnica lessingii	2008-07-04	62.1178	137.202
Artemisia arctica ssp. arctica	2008-07-04	62.1128	137.21
Artemisia frigida	2008-07-11	62.001	137.088
Artemisia tilesii	2008-07-04	62.1128	137.21
Artemisia tilesii	2008-07-09	62.1084	137.205
Artemisia tilesii	2008-07-04	62.118	137.202
Aster sibirica	2008-07-11	62.025	137. 057
Astragalus bodinii	2008-07-06	62.0496	137.144
Astragalus umbellatus	2008-06-28	62.1297	137.269
Barbarea orthoceras	2008-07-10	62.1084	137.205
Barbarea orthoceras	2008-07-04	62.1237	137.215
Betula glandulosa	2008-06-29	62.0731	137.165
Betula glandulosa	2008-06-30	62.1301	137.27
Bistorta plumosa	2008-06-28	62.13	137.269
Bistorta plumosa	2008-06-29	62.0729	137.165
Bistorta vivipara	2008-07-04	62.1215	137.21
Botrychium lunaria	2008-07-04	62.1131	137.209
Bromus inermis var. arctica	2008-07-01	62.043	137.114
Bromus inermis var. arctica	2008-07-11	62.001	137.088
Bupleurum americanum	2008-07-11	62.001	137. 088
Calamagrostis lapponica	2008-07-12	62.1088	137.206
Campanula lasiocarpa	2008-07-05	62.0646	137.161
Campanula lasiocarpa	2008-07-01	62.0595	137.157
Campanula uniflora	2008-07-14	62.126	137.201
Specimen name	collection date	WGS 84 coordinates
		Lat.	Long.
Cardamine bellidifolia	2008-07-02	62.072	137.166
Cardamine purpurea	2008-07-02	62.0726	137.166
Carex atrosquama	2008-07-06	62.0478	137.144
Carex bigelowii	2008-07-02	62.0726	137.166
Carex bigelowii	2008-06-29	62.0729	137.165
Carex bigelowii	2008-06-27	62.1299	137.268
Carex bigelowii	2008-06-27	62.1299	137.268
Carex bigelowii	2008-07-06	62.1127	137.21
Carex bigelowii	2008-07-06	62.1128	137.21
Carex bigelowii	2008-07-12	62.1085	137.205
Carex capillris	2008-07-07	62.1128	137.211
Carex concinna	2008-07-07	62.0478	137.144
Carex membranacea	2008-07-11	62.025	137.057
Carex podocarpa	2008-07-04	62.118	137.202
Carex rupestris	2008-07-01	62.0595	137.157
Carex saxatilis	2008-07-11	62.025	137.057
Carex scirpoidea	2008-07-12	62.1105	137.204
Carex scirpoidea	2008-07-04	62.119	137.206
Carex supina ssp. spaniocarpa	2008-07-11	62.001	137.088
Carex vaginata	2008-07-04	62.119	137.206
Cassiope tetragona	2008-06-29	62.0728	137.165
Cerastium arvense	2008-07-11	62.001	137.088
Cerastium beeringianum	2008-07-10	62.1085	137.206
Cerastium beeringianum	2008-07-04	62.1232	137.215
Chamaedaphne calyculata	2008-07-02	62.073	137.165
Chamaerhodos erecta ssp. nuttallii	2008-07-11	62.001	137.088
Chamerion latifolium	2008-06-30	62.1307	137.272
Claytonia sarmentosa	2008-07-02	62.0726	137.166
Comarum palustre	2008-07-09	62.0914	137.178
Cornus canadensis	2008-07-04	62.118	137.204
Corydalis pauciflora	2008-07-04	62.118	137.202
Corydalis pauciflora	2008-06-27	62.1278	137.268
Cystopteris fragilis	2008-07-05	62.0643	137.16
Dasiphora floribunda	2008-07-07	62.1127	137.211
Delphinium glaucum	2008-07-06	62.0543	137.158
Descurainia sophioides	2008-06-30	62.1308	137.272
Descurainia sophioides	2008-07-10	62.1084	137.206
Diphasiastrum alpinum	2008-07-02	62.072	137.166
Diphasiasturm sitchense	2008-06-27	62.1301	137.268
Dodecatheon frigidum	2008-06-27	62.1298	137.27
Dodecatheon frigidum	2008-06-28	62.1298	137.271
Douglasia gormanii	2008-07-01	62.0595	137.157
Douglasia gormanii	2008-07-02	62.067	137.177
Draba breweri var. cana	2008-07-11	62.001	137.088
Draba fladnizensis	2008-07-05	62.0644	137.16
Draba fladnizensis	2008-07-12	62.1137	137.202
Draba juvenilis	2008-07-04	62.118	137.203
Specimen name	collection date	WGS 84 coordinates
		Lat.	Long.
Draba nivalis	2008-07-02	62.069	137.167
Draba praealta	2008-07-06	62.0543	137.158
Dryas octopetala	2008-07-12	62.1137	137.202
Dryas octopetala	2008-06-26	62.1235	137.214
Dryas octopetala	2008-06-29	62.0728	137.165
Dryopteris fragrans	2008-07-05	62.0644	137.16
Elymus trachycaulus	2008-07-12	62.1092	137.206
Emetrum nigrum ssp. hermaphroditum	2008-06-28	62.1303	137.269
Emetrum nigrum ssp. hermaphroditum	2008-06-29	62.0728	137.165
Equisetum fluviatile	2008-06-30	62.1316	137.274
Equisetum palustre	2008-07-11	62.025	137.057
Equisetum scirpoides	2008-06-27	62.1298	137.268
Equisetum scirpoides	2008-06-30	62.1299	137.271
Equisetum sylvaticum	2008-06-27	62.1088	137.201
Equisetum variegatum ssp. variegatum	2008-06-26	62.1324	137.273
Eremogone capillaris	2008-07-11	62.001	137.088
Erigeron acris ssp. politus	2008-07-10	62.1088	137.205
Erigeron prupuratus	2008-07-10	62.1084	137.205
Erigeron uniflorus ssp. eriocephalus	2008-07-06	62.0477	137.145
Eriophorum angustifolium	2008-07-04	62.1217	137.213
Eriophorum brachyantherum	2008-07-04	62.1217	137.213
Eriophorum scheuchzeri	2008-07-05	62.076	137.156
Erysimum cheiranthoides	2008-07-10	62.1088	137.205
Festuca altaica	2008-06-29	62.0728	137.165
Festuca altaica	2008-07-06	62.1129	137.21
Festuca altaica	2008-07-07	62.1127	137.211
Festuca altaica	2008-06-30	62.13	137.271
Festuca altaica	2008-06-27	62.1297	137.268
Festuca brevissima	2008-07-07	62.0543	137.158
Gentiana glauca	2008-07-09	62.0909	137.173
Gentiana prostrata	2008-07-14	62.123	137. 199
Gentianella propinqua	2008-07-06	62.0543	137.158
Hedysarum alpinum	2008-07-11	62.025	137.057
Helictotrichon hookeri	2008-07-11	62.001	137.088
Hierochloe alpina ssp. alpina	2008-07-05	62.0732	137.166
Hierochloe alpina ssp. alpina	2008-06-29	62.0728	137.165
Hierochloe alpina ssp. alpina	2008-07-02	62.073	137.166
Hierochloe alpina ssp. alpina	2008-07-05	62.0643	137.16
Hordeum jubatum	2008-07-10	62.1085	137.205
Huperzia selago	2008-06-29	62.0726	137.165
Juncus castaneus	2008-06-26	62.1303	137.273
Juncus castaneus	2008-07-07	62.0478	137.145
Juncus castaneus	2008-07-05	62.0762	137.156
Lagotis minor	2008-07-04	62.1178	137.202
Ledum groenlandicum	2008-06-28	62.1299	137.269
Ledum palustre ssp. decumbens	2008-06-26	62.1297	137.269
Ledum palustre ssp. decumbens	2008-06-29	62.0728	137.165
Specimen name	collection date	WGS 84 coordinates
		Lat.	Long.
Lupinus arcticus	2008-07-04	62.1194	137.201
Luzula groenlandica (?)	2008-07-04	62.1232	137.215
Luzula multiflora ssp. Frigida	2008-06-26	62.1303	137.272
Luzula multiflora ssp. frigida	2008-07-07	62.1128	137.211
Luzula multiflora ssp. frigida	2008-07-12	62.1061	137.198
Luzula parviflora ssp. parviflora	2008-07-07	62.1128	137.211
Luzula parviflora ssp. parviflora	2008-07-09	62.0899	137.167
Luzula rufescens	2008-07-11	62.106	137.198
Luzula spicata	2008-07-13	62.1574	137.231
Lygopodium lagopus	2008-07-02	62.073	137.165
Mertensia paniculata var. paniculata	2008-06-30	62.1302	137.27
Minuartia arctica	2008-07-04	62.1203	137.227
Minuartia macrocarpa	2008-07-13	62.1314	137.224
Minuartia obtusiloba	2008-07-11	62.001	137.088
Minuartia rubella	2008-07-04	62.1234	137.215
Minuartia rubella	2008-07-11	62.001	137.088
Minuartia rubella	2008-07-10	62.1086	137.206
Moehringia lateriflora	2008-07-06	62.0496	137.144
Moneses uniflora	2008-07-11	62.025	137.057
Moneses uniflora	2008-07-07	62.1126	137.211
Montia bostockii	2008-06-28	62.1298	137.269
Myosotis asiatica	2008-07-04	62.118	137.202
Orthilia secunda	2008-06-30	62.1302	137.27
Oxyria digyna	2008-07-04	62.118	137.202
Oxytropis campestris var. varians	2008-07-11	62.001	137.088
Oxytropis deflexa var. sericea	2008-07-11	62.025	137.057
Oxytropis huddelsonii	2008-07-14	62.126	137.201
Oxytropis huddelsonii	2008-07-02	62.069	137.175
Oxytropis huddelsonii	2008-07-02	62.067	137.177
Oxytropis scammaniana	2008-06-29	62.0731	137.165
Oxytropis scammaniana	2008-07-04	62.12	137.205
Parnassia kotzebuei	2008-07-03	62.1129	137.209
Parnassia palustris v.ar tenuis	2008-07-02	62.13	137 274
Parrya nudicaulis	2008-06-27	62.13	137.268
Parrya nudicaulis	2008-07-05	62.073	137.165
Pedicularis capitata	2008-06-30	62.1302	137.269
Pedicularis capitata	2008-07-03	62.1129	137. 2092
Pedicularis capitata	2008-07-02	62.0729	137.165
Pedicularis kanei	2008-07-02	62.0731	137.166
Pedicularis kanei	2008-07-11	62.1101	137.204
Pedicularis labradorica	2008-06-28	62.1301	137.269
Pedicularis labradorica	2008-06-30	62.13	137.27
Pedicularis oederi	2008-06-28	62.1301	137.268
Pedicularis oederi	2008-06-26	62.1235	137.213
Pedicularis oederi	2008-07-02	62.0728	137.165
Pedicularis sudetica	2008-06-27	62.1301	137.271
Pedicularis sudetica	2008-07-05	62.0758	137.158
Specimen name	collection date	WGS 84 coordinates
		Lat.	Long.
Penstemon gormanii	2008-07-11	62.001	137.088
Petasites frigidus var. frigidus	2008-07-04	62.118	137.202
Petasites frigidus var. frigidus	2008-06-29	62.0728	137.165
Phleum alpinum	2008-07-14	62.1257	137.202
Picea glauca	2008-07-06	62.1128	137.21
Picea mariana	2008-07-07	62.13	137.27
Poa alpina	2008-07-11	62.11	137.204
Poa arctica ssp. arctica	2008-06-30	62.1301	137.271
Poa arctica ssp. arctica	2008-06-28	62.1299	137.269
Poa arctica ssp. arctica	2008-07-05	62.0732	137.166
Poa arctica ssp. arctica	2008-07-06	62.1128	137.21
Poa arctica ssp. caespitans	2008-07-11	62.025	137.057
Poa arctica ssp. caespitans	2008-07-04	62.1232	137.215
Poa arctica ssp. caespitans	2008-07-07	62.1127	137.211
Poa glauca	2008-07-05	62.0643	137.16
Poa pratensis ssp. alpigena	2008-07-07	62.1127	137.221
Podistera yukonensis	2008-07-14	62.0786	137.152
Polemonium acutiflorum	2008-06-27	62.1298	127.271
Polemonium acutiflorum	2008-07-04	62.1128	137.21
Polemonium pulcherimum	2008-07-07	62.0543	137.158
Populus balsamifera ssp. trichocarpa	2008-06-26	62.1308	137.274
Populus tremuloides	2008-06-27	62.1336	137.271
Potentilla diversifolia	2008-07-07	62.1126	137.211
Potentilla nivea	2008-07-11	62.001	137.088
Potentilla uniflora	2008-07-01	62.0595	137.157
Potentilla uniflora	2008-07-05	62.0643	137.16
Potentilla uniflora	2008-06-26	62.1235	137.213
Pulsatilla patens var. multifida	2008-07-01	62.0595	137.157
Pyrola grandiflora	2008-07-02	62.072	137.166
Pyrola grandiflora	2008-07-01	62.0595	137.157
Pyrola grandiflora	2008-06-26	62.1235	137.213
Ranunculus nivalis	2008-07-04	62.118	137.202
Ranunculus nivalis	2008-07-13	62.1495	137.229
Rhodiola integrifolia	2008-07-04	62.118	137.202
Rhododendron lapponicum	2008-06-26	62.1235	137.213
Rosa acicularis	2008-07-04	62.1225	137.209
Rubus arcticus ssp. acaulis	2008-07-09	62.1062	137.196
Rubus arcticus ssp. acaulis	2008-07-12	62.1059	137.198
Rubus chamaemorus	2008-06-28	62.1301	137.269
Rubus chamaemorus	2008-07-09	62.0914	137.178
Rumex arcticus	2008-06-27	62.13	137.279
Salix alaxensis var. alaxensis	2008-06-26	62.1234	137.215
Salix arbusculoides	2008-06-26	62.1234	137.215
Salix arctica	2008-06-29	62.0728	137.165
Salix glauca	2008-07-03	62.1127	137.211
Salix glauca	2008-07-02	62.0725	137.166
Salix glauca	2008-07-02	62.0728	137.165
Specimen name	collection date	WGS 84 coordinates
		Lat.	Long.
Salix glauca	2008-07-02	62.0728	137.166
Salix glauca	2008-06-27	62.1299	137.268
Salix myrtillifolia	2008-06-30	62.1302	137.273
Salix polaris	2008-07-02	62.0725	137.166
Salix polaris	2008-07-04	62.1178	137.195
Salix pulchra	2008-06-29	62.0724	137.162
Salix pulchra	2008-06-27	62.1297	137.268
Salix pulchra	2008-06-29	62.0732	137.165
Salix pulchra	2008-06-26	62.1088	137.201
Salix reticulata	2008-06-28	62.1301	137.269
Salix richardsonii	2008-07-02	62.1127	137.211
Salix richardsonii	2008-07-06	62.1128	137.21
Saussurea angustifolia var. yukonensis	2008-07-10	62.106	137.197
Saussurea angustifolia var. yukonensis	2008-06-28	62.1299	137.269
Saxifraga hieracifolia	2008-07-12	62.1132	137.202
Saxifraga nelsoniana ssp. pacifica	2008-07-04	62.118	137.202
Saxifraga reflexa	2008-07-05	62.0664	137.16
Saxifraga rivularis	2008-07-14	62.1234	137.215
Saxifraga rufopilosa	2008-07-14	62.125	137.2
Saxifraga tricuspidata	2008-07-12	62.1139	137.202
Selaginella sibirica	2008-07-14	62.125	137.2
Senecio lugens	2008-06-30	62.1305	137.273
Senecio sheldonensis	2008-07-11	62.025	137.057
Silene acaulis	2008-06-26	62.1236	137.212
Silene repens	2008-07-14	62.125	137.202
Silene uralensis ssp. Uralensis	2008-07-14	62.125	137.199
Solidago simplex	2008-07-11	62.001	137.088
Stellaria longipes	2008-06-26	62.0727	137.165
Stellaria longipes	2008-06-30	62.1304	137.273
Stellaria longipes	2008-07-11	62.001	137.088
Tephroseris frigida	2008-06-26	62.0727	137.165
Tephroseris frigida	2008-06-28	62.1301	137. 2690
Tephroseris kjellmanii	2008-07-04	62.119	137.202
Tephroseris tundricola	2008-07-05	62.0664	137.16
Tephroseris tundricola	2008-07-14	62.125	137.202
Topieldia pusilla	2008-07-04	62.1217	137.213
Trisetum spicatum	2008-07-05	62.0732	137.166
Trisetum spicatum	2008-07-12	62.1059	137.198
Trisetum spicatum	2008-07-07	62.1113	137.211
Vaccinium oxycoccos	2008-07-09	62.0908	137.174
Vaccinium uliginosum	2008-06-28	62.1299	137.269
Vaccinium vitis idea	2008-06-27	62.1299	137.268
Vaccinium vitis idea	2008-06-29	62.0731	137.166
Valeriana capitata	2008-06-30	62.1298	137.271
Valeriana capitata	2008-07-07	62.1129	137.211
Wilhelmsia physodes	2008-06-26	62.1303	137.273
Zigadenus elegans	2008-07-04	62.118	137.203

## Sheet: bryophytes
no	Specimen name	collection date	WGS 84		locale
			Lat.	Long.
1	Sphagnum riparium	2008-07-09	62.0914	137.176	EF Nansen creek
2	Sphagnum rossowii	2008-07-04	62.118	137.202	Summit creek
3	Hylocomium splendesn	2008-06-29	62.073	137.165	trenches
4	Hylocomium splendesn	2008-07-02	62.0731	137.165	trench 1
5	Polytrichum piliferum	2008-07-02	62.0731	137.165	trench 1
6	Polytrichum hyperboreum	2008-06-29	62.073	137.165	trenches
7	Pohlia nutans	2008-07-02	62.0731	137.165	trench 1
8	Dicranum (elongatum?)	2008-07-02	62.0731	137.165	trench1
9	Dicranum groenlandicum	2008-07-02	62.073	137.165	trenches
10	Dicranum (elongatum?)	2008-06-29	62.073	137.165	trenches
11	Dicranum (undulatum?)	2008-07-02	62.073	137.165	trench 1
12	Drepanocladus uncinatus	2008-07-02	62.0731	137.165	trench 1
13	Timmia (norvegica?)	2008-07-02	62.0731	137.165	trench 1
14	Barbilophozia spec + Anastrophyllum spec.	2008-06-29	62.073	137.165	trenches
15	Anastrophyllum (minutum?)	2008-07-02	62.073	137.165	trench 1
16	Blepharostoma trichophylla	2008-07-02	62.0731	137.165	trench 1
17	Lophozia spec. with Tritomaria qu.	2008-07-02	62.0731	137.165	trench1
18	Anastrophyllum (saxicola?)	2008-06-29	62.073	137.165	trenches
19	Anastrophyllum spec. 2	2008-06-29	62.073	137.165	trenches
20	Pleurozium schreberi	2008-07-02	62.073	137.165	trenches
21	Ceratodon purpureus	2008-07-02	62.0731	137.165	trench 1
22	Aulacomium turgidum	2008-06-29	62.073	137.165	trenches
23	Rhytidium rugosum	2008-06-29	62.073	137.165	trenches
24	Barbilophozia spec	2008-07-02	62.073	137.165	trench 1
25	Cephaloziella (divaricata?)	2008-07-02	62.073	137.165	trenches
26	Dicranum (elongatum?)	2008-07-02	62.0731	137.166	trench 2
27	Drepanocladus uncinatus	2008-07-02	62.0731	137.166	trench 2
28	Timmia (norvegica?)	2008-07-02	62.0731	137.166	trench 2
29	Pohlia nutans	2008-07-05	62.0732	137.166	trench 3
30	Drepanocladus uncinatus	2008-07-05	62.0732	137.166	trench 3
31	Rhizomnium gracile	2008-07-05	62.0732	137.166	trench 3
32	Lophozia spec.	2008-07-05	62.0732	137.166	trench 3
33	Dicranum spec.	2008-07-05	62.0732	137.166	trench 3
34	Dicranum spec. 2	2008-07-05	62.0732	137.166	trench 3 (M6)
35	Liverworts w. Polytrichum + Dicranum	2008-07-05	62.0722	137.166	trench 3
36	Anastrophyllum div. spec. + Tritomaria sp.	2008-07-05	62.0732	137.166	trench 3
37	Hypnum revolutum	2008-07-12	62.1137	137.202	N of T4
38	Grimmia ?	2008-07-12	62.1137	137.292	N of T4
39	Tayloria lingulata w. Dicranella grevilleanaa	2008-07-02	62.0713	137.168	run off SW trenches
40	Calliergon stramineum	2008-07-09	62.0914	137.176	EF Nansen creek
41	Polytrichum strictum	2008-07-02	62.0724	137.166	trenches
42	Drepanocladus anduncus	2008-07-09	62.0914	137.176	EF Nansen creek
43	Splachnum luteum	2008-06-30	62.1299	137.272	W of T1
44	Preissia quadrata	2008-07-07	62.0477	137.144	Nansen mine camp
45	Tetraplodon mnioides	2008-07-11	62.001	137.088	culture camp
46	Hylocomium splendesn	2008-06-27	62.1298	137.268	T1A1
47	Sphagnum quinquefarium	2008-06-27	62.1298	137.268	T1A1
48	Sphagnum spec.	2008-07-09	62.0914	137.176	EF Nansen creek
49	Sphagnum spec.	2008-07-07	62.1127	137.211	T2C3
50	Sphagnum spec.	2008-07-03	62.1129	137.209	T2A2
51	Sphagnum spec.	2008-07-09	62.1057	137.196	S of T3B1/60
52	Ptilidium ciliare	2008-06-30	62.1303	137.27	T1C3

## Sheet: lichens
no	Specimen name	collection date	WGS 84		locale
			Lat.	Long.
1	Stereocaulon tomentosum	2008-06-29	62.073	137.165	SW trench 1
2	Stereocaulon tomentosum	2008-07-02	62.0731	137.165	trench 1
3	Petigera malacea	2008-07-02	62.0731	137.165	trench 1
4	Petigera aphtosa	2008-07-02	62.0731	137.165	trench 1
5	Petigera aphtosa	2008-06-29	62.073	137.165	SW trench 1
6	Solorina crocea	2008-07-02	62.0731	137.165	trench 1
7	Cladonia mitis	2008-07-02	62.0731	137.165	trench 1
8	Cladonia mitis	2008-06-29	62.073	137.165	SW trench 1
9	Masonhalea richardsonii	2008-07-02	62.0731	137.165	trench 1
10	Cladonia coccifera	2008-07-02	62.0731	137.165	trench 1
11	Cladonia gracilis ssp. turbinata	2008-07-02	62.0731	137.165	trench 1
12	Cladonia gracilis	2008-06-29	62.073	137.165	SW trench 1
13	Cladonia gracilis var. gracilis	2008-07-02	62.0731	137.165	trench 1
14	Psoroma hynorum	2008-07-02	62.0731	137.165	trench 1
15	Lecanora polytropa & Lecidella stigmatea ?	2008-07-02	62.0731	137.165	trench 1
16	Dactylina beeringica	2008-07-02	62.0731	137.165	trench 1
17	Dactylina arctica	2008-06-29	62.073	137.165	SW trench 1
18	Placynthiella spec.	2008-07-02	62.0731	137.166	trench 2
19	Placynthiella spec.	2008-07-05	62.0732	137.166	trench 3
20	Flavocetraria cucullata	2008-07-02	62.0731	137.166	trench 2
21	Flavocetraria cucullata	2008-06-29	62.073	137.165	SW trench 1
22	Alectoria ochroleuca	2008-07-02	62.0731	137.166	SW trench 2
23	Alectoria ochroleuca	2008-06-29	62.073	137.165	SW trench 1
24	Cetraria aculeata	2008-07-02	62.0731	137.165	trench 1
25	Coelocaulon divergens	2008-07-02	62.0731	137.166	SW trench 2
26	Nephroma esxpallidum	2008-07-02	62.0727	137.167	S of trenches
27	Umbilicaria proboscidea	2008-07-02	62.072	137.166	hump S of trenches
28	Kaernefeltia merrillii	2008-07-02	62.072	137.166	hump S of trenches
29	Vulpicida tilesii	2008-07-02	62.0718	137.165	hump S of trenches
30	Ophioparma spec.	2008-07-14	62.1261	137.2	Klaza head
31	Cetraria islandica	2008-07-05	62.0732	137.166	trench 3
32	Cladonia coccifera	2008-06-29	62.0731	137.165	NW trench 1
33	Cladonia gracilis ssp. turbinata	2008-07-05	62.0732	137.166	trench 3
34	Peltigera rufescens	2008-07-02	62.0731	137.165	trench 1
35	Peltigera venosa	2008-07-07	62.1127	137.211	T2C2
