# Supplementary material for: Gišogenetic Variation in White-Spruce (Picea glauca (Moench) Voss) Trees of Yukon Beringia, Canada
Source: MDPI journal article supplement (doi:10.3390/f14040787), 2023-04-11
Supplement: s1 [file s1 › TableS2_soilMoisture-pH.xlsx]

## Sheet: Tansect 1
Sample ID	Fb (g)	F+MS (g)	F+DS (g)	SFW (g)	SDW (g)	H2O	Moisture%	pH	Comments
T1A1/0a	0.8	18.19	4.01	17.39	3.21	14.18	81.5411	4.98			Explanation
T1A1/0b	0.8	18.04	3.83	17.24	3.03	14.21	82.4246	5.03			Fb = plain dry foil
T1A1/0c	0.83	13.14	3.02	12.31	2.19	10.12	82.2096	4.93			F+MS - foil + moist soil
T1A1/30a	0.82	26.17	9.87	25.35	9.05	16.3	64.2998	5.2			F+Ds = foil + dry soil
T1A1/30b	0.81	25.83	11.16	25.02	10.35	14.67	58.6331	5.32			SFW - soil fresh weight
T1A1/30c	0.81	21.63	8.97	20.82	8.16	12.66	60.8069	5.24			SDW - soil dry weight
T1A1/60a	0.81	9.73	3.53	8.92	2.72	6.2	69.5067	5.71			H2O - grams of water
T1A1/60b	0.82	9.24	3.09	8.42	2.27	6.15	73.0404	5.55			Moisture % - grams of water divided by soil fresh weight
T1A1/60c	0.82	9.79	4.02	8.97	3.2	5.77	64.3255	5.68
T1A2/0a	0.83	17.21	5.57	16.38	4.74	11.64	71.0623	5.15
T1A2/0b	0.84	21.91	6.63	21.07	5.79	15.28	72.5202	5.23
T1A2/0c	0.82	24.24	8.51	23.42	7.69	15.73	67.1648	4.99
T1A2/30a	0.82	22.67	5.88	21.85	5.06	16.79	76.8421	5.1
T1A2/30b	0.81	21.54	5.12	20.73	4.31	16.42	79.2089	4.92
T1A2/30c	0.81	20.88	8.35	20.07	7.54	12.53	62.4315	4.78
T1A2/60a	0.82	23.81	8.4	22.99	7.58	15.41	67.0291	5.14
T1A2/60b	0.82	18.1	5.13	17.28	4.31	12.97	75.0579	5.12
T1A2/60c	0.83	18.11	6.36	17.28	5.53	11.75	67.9977	5.16
T1A3/0a	0.77	8.53	3.62	7.76	2.85	4.91	63.2732	4.55
T1A3/0b	0.83	11.21	4.71	10.38	3.88	6.5	62.6204	4.46
T1A3/0c	0.83	9.89	4.05	9.06	3.22	5.84	64.4592	4.42
T1A3/30a	0.83	13.3	3.19	12.47	2.36	10.11	81.0746	4.77
T1A3/30b	0.82	15.4	4.34	14.58	3.52	11.06	75.8573	4.71
T1A3/30c	0.82	17.44	6.46	16.62	5.64	10.98	66.065	4.73
T1A3/60a	0.84	10.48	3.89	9.64	3.05	6.59	68.361	4.78
T1A3/60b	0.79	10.96	5.89	10.17	5.1	5.07	49.8525	4.86
T1A3/60c	0.81	11.5	5.19	10.69	4.38	6.31	59.0271	4.95
T1B1/0a	0.81	14.72	4.13	13.91	3.32	10.59	76.1323	5.07
T1B1/0b	0.8	16.15	4.37	15.35	3.57	11.78	76.7427	5.04
T1B1/0c	0.79	12.37	3.67	11.58	2.88	8.7	75.1295	5.09
T1B1/30a	0.79	23.34	5.3	22.55	4.51	18.04	80	4.72
T1B1/30b	0.8	22.04	4.42	21.24	3.62	17.62	82.9567	4.8
T1B1/30c	0.79	23.04	5.3	22.25	4.51	17.74	79.7303	4.89
T1B1/60a	0.78	12.26	6.51	11.48	5.73	5.75	50.0871	4.15
T1B1/60b	0.8	8.53	4.35	7.73	3.55	4.18	54.075	4.04
T1B1/60c	0.78	9.1	4.67	8.32	3.89	4.43	53.2452	4.09
T1B2/0a	0.78	11.63	2.94	10.85	2.16	8.69	80.0922	4.99
T1B2/0b	0.84	17.18	4.02	16.34	3.18	13.16	80.5386	4.87
T1B2/0c	0.84	15.77	3.89	14.93	3.05	11.88	79.5713	4.83
T1B2/30a	0.84	18.54	5.74	17.7	4.9	12.8	72.3164	4.55
T1B2/30b	0.84	17.79	5.65	16.95	4.81	12.14	71.6224	4.65
T1B2/30c	0.82	18.85	6.74	18.03	5.92	12.11	67.1658	4.53
T1B2/60a	0.84	7.3	2.31	6.46	1.47	4.99	77.2446	4.49
T1B2/60b	0.82	7.99	2.45	7.17	1.63	5.54	77.2664	4.51
T1B2/60c	0.82	6.86	2.16	6.04	1.34	4.7	77.8146	4.31
T1B3/0a	0.81	10.52	3.19	9.71	2.38	7.33	75.4892	5.05
T1B3/0b	0.81	11.69	3.38	10.88	2.57	8.31	76.3787	4.79
T1B3/0c	0.85	10.57	3.25	9.72	2.4	7.32	75.3086	4.87
T1B3/30a	0.84	26.12	9.84	25.28	9	16.28	64.3987	5.03
T1B3/30b	0.84	29.58	7.04	28.74	6.2	22.54	78.4273	5.22
T1B3/30c	0.83	24.72	6.77	23.89	5.94	17.95	75.136	5.09
T1B3/60a	0.82	10.23	3.64	9.41	2.82	6.59	70.0319	4.48
T1B3/60b	0.82	9.56	3.4	8.74	2.58	6.16	70.4805	4.51
T1B3/60c	0.81	7.52	2.88	6.71	2.07	4.64	69.1505	4.52
T1C1/0a	0.81	13.51	3.01	12.7	2.2	10.5	82.6772	4.65
T1C1/0b	0.81	10.52	2.57	9.71	1.76	7.95	81.8744	4.71
T1C1/0c	0.81	11.31	2.62	10.5	1.81	8.69	82.7619	4.63
T1C1/30a	0.84	17.89	7.05	17.05	6.21	10.84	63.5777	5.51
T1C1/30b	0.83	15.98	6.79	15.15	5.96	9.19	60.6601	5.76
T1C1/30c	0.81	15.78	5.07	14.97	4.26	10.71	71.5431	5.44
T1C1/60a	0.82	6.21	2.25	5.39	1.43	3.96	73.4694	4.87
T1C1/60b	0.81	5.82	2.42	5.01	1.61	3.4	67.8643	5.66
T1C1/60c	0.79	4.99	1.81	4.2	1.02	3.18	75.7143	4.67
T1C2/0a	0.8	9.42	3.15	8.62	2.35	6.27	72.7378	4.39
T1C2/0b	0.92	9.24	3.2	8.32	2.28	6.04	72.5962	4.36
T1C2/0c	0.86	8.96	3.05	8.1	2.19	5.91	72.963	4.52
T1C2/30a	0.81	12.43	2.65	11.62	1.84	9.78	84.1652	5.62
T1C2/30b	0.8	17.86	4.58	17.06	3.78	13.28	77.8429	5.66
T1C2/30c	0.92	20.84	5.86	19.92	4.94	14.98	75.2008	5.55
T1C2/60a	0.87	5.42	1.93	4.55	1.06	3.49	76.7033	5.26
T1C2/60b	0.84	6.15	2.27	5.31	1.43	3.88	73.0697	4.52
T1C2/60c	0.82	6.1	2.15	5.28	1.33	3.95	74.8106	4.62
T1C3/0a	0.93	9.01	2.42	8.08	1.49	6.59	81.5594	5.25
T1C3/0b	0.86	7.89	2.16	7.03	1.3	5.73	81.5078	4.72
T1C3/0c	0.84	7.36	2.05	6.52	1.21	5.31	81.4417	4.95
T1C3/30a	0.8	18.58	3.17	17.78	2.37	15.41	86.6704	5.5
T1C3/30b	0.79	17.37	3.13	16.58	2.34	14.24	85.8866	5.55
T1C3/30c	0.92	11.8	2.61	10.88	1.69	9.19	84.4669	5.56
T1C3/60a	0.89	7.95	2.55	7.06	1.66	5.4	76.4873	5.15
T1C3/60b	0.85	5.28	2.04	4.43	1.19	3.24	73.1377	5.35
T1C3/60c	0.81	5.83	1.93	5.02	1.12	3.9	77.6892	5.47

## Sheet: Tansect 2
Sample ID	Fb (g)	F+MS (g)	F+DS (g)	SFW (g)	SDW (g)	H2O	Moisture%	pH	Comments
T2A1/0a	0.76	6.82	2.85	6.06	2.09	3.97	65.5116	5.08
T2A1/0b	0.76	6.42	2.67	5.66	1.91	3.75	66.2544	5.46
T2A1/0c	0.75	5.73	2.77	4.98	2.02	2.96	59.4378	5.05
T2A1/30a	0.75	6.92	1.88	6.17	1.13	5.04	81.6856	4.03
T2A1/30b	0.77	8.94	2.08	8.17	1.31	6.86	83.9657	4.27
T2A1/30c	0.78	8.52	2.62	7.74	1.84	5.9	76.2274	4.17
T2A1/60a	0.77	5.99	1.78	5.22	1.01	4.21	80.6513	4.51
T2A1/60b	0.79	5.76	1.95	4.97	1.16	3.81	76.66	4.6
T2A1/60c	0.79	7.25	2.29	6.46	1.5	4.96	76.7802	4.52
T2A2/0a	0.76	9.72	2.53	8.96	1.77	7.19	80.2455	5.17
T2A2/0b	0.75	8.95	2.44	8.2	1.69	6.51	79.3902	5.16
T2A2/0c	0.75	11.06	2.85	10.31	2.1	8.21	79.6314	5.55
T2A2/30a	0.75	11.15	3.2	10.4	2.45	7.95	76.4423	5.22
T2A2/30b	0.75	7.24	2.27	6.49	1.52	4.97	76.5794	5.16
T2A2/30c	0.76	10.52	2.98	9.76	2.22	7.54	77.2541	5.22
T2A2/60a	0.79	14.06	3.36	13.27	2.57	10.7	80.633	4.56
T2A2/60b	0.84	9.13	2.5	8.29	1.66	6.63	79.9759	4.53
T2A2/60c	0.81	8.04	2.3	7.23	1.49	5.74	79.3914	4.36
T2A3/0a	0.81	7.1	2.52	6.29	1.71	4.58	72.814	5.45
T2A3/0b	0.8	5.53	2.07	4.73	1.27	3.46	73.1501	5.51
T2A3/0c	0.8	7.11	2.46	6.31	1.66	4.65	73.6926	5.31
T2A3/30a	0.8	10.11	2.69	9.31	1.89	7.42	79.6992	5.39
T2A3/30b	0.81	9.46	2.5	8.65	1.69	6.96	80.4624	5.08
T2A3/30c	0.81	12.36	3.08	11.55	2.27	9.28	80.3463	5.72
T2A3/60a	0.81	10.84	2.61	10.03	1.8	8.23	82.0538	4.68
T2A3/60b	0.84	7.66	2.09	6.82	1.25	5.57	81.6716	4.68
T2A3/60c	0.84	8.83	2.35	7.99	1.51	6.48	81.1014	4.85
T2B1/0a	0.83	13.24	8.07	12.41	7.24	5.17	41.66	5.65
T2B1/0b	0.81	14.04	7.49	13.23	6.68	6.55	49.5087	5.99
T2B1/0c	0.82	15.82	10.37	15	9.55	5.45	36.3333	5.62
T2B1/30a	0.82	15.96	12.37	15.14	11.55	3.59	23.712	5.72
T2B1/30b	0.82	18.04	13.84	17.22	13.02	4.2	24.3902	5.61
T2B1/30c	0.83	13.59	10.09	12.76	9.26	3.5	27.4295	5.8
T2B1/60a	0.83	19.33	14.05	18.5	13.22	5.28	28.5405	5.26
T2B1/60b	0.8	15.13	9.84	14.33	9.04	5.29	36.9156	5.33
T2B1/60c	0.82	21.23	15.98	20.41	15.16	5.25	25.7227	5.32
T2B2/0a	0.86	5.54	2.14	4.68	1.28	3.4	72.6496	4.65
T2B2/0b	0.91	5.86	2.23	4.95	1.32	3.63	73.3333	4.75
T2B2/0c	0.87	6.02	2.44	5.15	1.57	3.58	69.5146	4.36
T2B2/30a	0.85	9.43	3.66	8.58	2.81	5.77	67.2494	4.26
T2B2/30b	0.82	10.77	3.99	9.95	3.17	6.78	68.1407	4.3
T2B2/30c	0.79	11.18	4.1	10.39	3.31	7.08	68.1424	4.38
T2B2/60a	0.82	4.57	1.95	3.75	1.13	2.62	69.8667	4.9
T2B2/60b	0.84	3.78	1.67	2.94	0.83	2.11	71.7687	5.07
T2B2/60c	0.88	3.68	1.92	2.8	1.04	1.76	62.8571	5.17
T2B3/0a	0.88	16.27	7.47	15.39	6.59	8.8	57.18	7.57
T2B3/0b	0.81	17.92	8.63	17.11	7.82	9.29	54.2957	6.8
T2B3/0c	0.83	11.64	6.1	10.81	5.27	5.54	51.2488	6.3
T2B3/30a	0.8	7.06	2.39	6.26	1.59	4.67	74.6006	3.98
T2B3/30b	0.79	7.39	2.63	6.6	1.84	4.76	72.1212	3.94
T2B3/30c	0.83	9.61	4.07	8.78	3.24	5.54	63.0979	4.47
T2B3/60a	0.85	4.21	1.92	3.36	1.07	2.29	68.1548	3.76
T2B3/60b	0.87	5.09	2.27	4.22	1.4	2.82	66.8246	3.72
T2B3/60c	0.76	3.71	2.04	2.95	1.28	1.67	56.6102	3.92
T2C1/0a	0.82	19.07	10.96	18.25	10.14	8.11	44.4384	7.2
T2C1/0b	0.81	16.5	8.67	15.69	7.86	7.83	49.9044	7.38
T2C1/0c	0.8	18.94	13.27	18.14	12.47	5.67	31.2569	7.57
T2C1/30a	0.79	8.11	2.81	7.32	2.02	5.3	72.4044	4.85
T2C1/30b	0.79	9.91	3.17	9.12	2.38	6.74	73.9035	4.75
T2C1/30c	0.85	8.52	2.91	7.67	2.06	5.61	73.1421	4.85
T2C1/60a	0.84	10.95	4.27	10.11	3.43	6.68	66.0732	4.19
T2C1/60b	0.86	10.05	3.51	9.19	2.65	6.54	71.1643	4.24
T2C1/60c	0.86	10.59	3.86	9.73	3	6.73	69.1675	4.25
T2C2/0a	0.84	21.66	9.76	20.82	8.92	11.9	57.1566	7.24
T2C2/0b	0.83	18.56	10.04	17.73	9.21	8.52	48.0541	6.9
T2C2/0c	0.86	23.96	12.77	23.1	11.91	11.19	48.4416	6.99
T2C2/30a	0.83	4.98	2.5	4.15	1.67	2.48	59.759	5.53
T2C2/30b	0.81	3.07	1.86	2.26	1.05	1.21	53.5398	5.79
T2C2/30c	0.8	3.66	2.5	2.86	1.7	1.16	40.5594	5.65
T2C2/60a	0.81	22.89	13.52	22.08	12.71	9.37	42.4366	5.19
T2C2/60b	0.86	29.49	17.96	28.63	17.1	11.53	40.2724	5.14
T2C2/60c	0.85	26.43	15.85	25.58	15	10.58	41.3604	5.05
T2C3/0a	0.82	9.88	3.62	9.06	2.8	6.26	69.0949	6.31
T2C3/0b	0.86	18.23	8.03	17.37	7.17	10.2	58.7219	6.59
T2C3/0c	0.84	11.77	4.03	10.93	3.19	7.74	70.8143	6.34
T2C3/30a	0.82	13.77	9.95	12.95	9.13	3.82	29.4981	5.73
T2C3/30b	0.82	11.51	7.86	10.69	7.04	3.65	34.1441	5.96
T2C3/30c	0.85	13.88	10.14	13.03	9.29	3.74	28.703	5.6
T2C3/60a	0.83	9.72	3.35	8.89	2.52	6.37	71.6535	3.9
T2C3/60b	0.81	7.28	2.71	6.47	1.9	4.57	70.6337	4.13
T2C3/60c	0.85	8.24	3.02	7.39	2.17	5.22	70.636	4.43

## Sheet: Tansect 3
Sample ID	Fb (g)	F+MS (g)	F+DS (g)	SFW (g)	SDW (g)	H2O	Moisture%	pH	Comments
T3A1/0a	0.85	13.02	5.97	12.17	5.12	7.05	69.4679	4.26			F - foil
T3A1/0b	0.82	12.22	5.17	11.4	4.35	7.05	72.6565	4.2			F+MS - foil + moist soil
T3A1/0c	0.86	14.24	5.67	13.38	4.81	8.57	76.7116	4.13			F+Ds = foil + dry soil
T3A1/30a	0.81	22	7.32	21.19	6.51	14.68	89.2036	4.6			SFW - soil fresh weight
T3A1/30b	0.88	21.26	6.61	20.38	5.73	14.65	91.1501	4.41			SDW - soil dry weight
T3A1/30c	0.84	27.34	9.57	26.5	8.73	17.77	91.8547	4.27			H2O - grams of water
T3A1/60a	0.86	17.21	5.11	16.35	4.25	12.1	89.5698	3.93			Moisture % - grams of water divided by soil fresh weight
T3A1/60b	0.85	17.87	5.19	17.02	4.34	12.68	90.6985	3.88
T3A1/60c	0.86	18.23	5.51	17.37	4.65	12.72	89.724	3.89			11.0974
T3A2/0a	0.85	8.31	2.39	7.46	1.54	5.92	86.706	3.39
T3A2/0b	0.85	8.21	2.42	7.36	1.57	5.79	85.9142	3.44
T3A2/0c	0.84	7.06	2.12	6.22	1.28	4.94	85.6038	3.36
T3A2/30a	0.85	6.9	2.24	6.05	1.39	4.66	83.0257	3.88
T3A2/30b	0.86	14.79	4.85	13.93	3.99	9.94	84.6128	3.9
T3A2/30c	0.83	14.73	5.47	13.9	4.64	9.26	79.7683	4.04
T3A2/60a	0.84	6.74	2.42	5.9	1.58	4.32	79.0427	3.68
T3A2/60b	0.82	8.21	2.65	7.39	1.83	5.56	82.4541	3.67
T3A2/60c	0.87	8.21	2.6	7.34	1.73	5.61	83.6361	3.64
T3A3/0a	0.87	9.45	3.08	8.58	2.21	6.37	82.5754	3.26
T3A3/0b	0.83	7.74	2.55	6.91	1.72	5.19	81.8816	3.3
T3A3/0c	0.85	5.93	2.38	5.08	1.53	3.55	74.9318	3.36
T3A3/30a	0.84	18.83	4.29	17.99	3.45	14.54	98.1365	4.31
T3A3/30b	0.82	20.91	7.59	20.09	6.77	13.32	85.1574	4.02
T3A3/30c	0.86	21.62	5.36	20.76	4.5	16.26	98.1572	4.45
T3A3/60a	0.84	17	5.92	16.16	5.08	11.08	83.8315	4.15
T3A3/60b	0.83	13.34	4.59	12.51	3.76	8.75	81.8498	4.04
T3A3/60c	0.82	10.78	3.13	9.96	2.31	7.65	86.4473	3.96
T3B1/0a	0.85	6.84	2.42	5.99	1.57	4.42	79.7043	4.01
T3B1/0b	0.84	5.3	1.89	4.46	1.05	3.41	80.9709	3.91
T3B1/0c	0.82	5.8	2.04	4.98	1.22	3.76	80.4813	3.69
T3B1/30a	0.8	10.27	4.01	9.47	3.21	6.26	75.1517	4.36
T3B1/30b	0.87	9.86	3.8	8.99	2.93	6.06	76.0513	4.46
T3B1/30c	0.81	8.02	3.08	7.21	2.27	4.94	75.501	4.51
T3B1/60a	0.83	18.43	9.86	17.6	9.03	8.57	65.3687	4.47
T3B1/60b	0.84	19.95	11.51	19.11	10.67	8.44	62.4074	4.52
T3B1/60c	0.82	14.92	7.71	14.1	6.89	7.21	64.5105	4.55
T3B2/0a	0.84	23.82	9.66	22.98	8.82	14.16	83.0987	4.47
T3B2/0b	0.84	15.56	3.99	14.72	3.15	11.57	92.756	4.15
T3B2/0c	0.84	28.13	11.66	27.29	10.82	16.47	85.7962	4.48
T3B2/30a	0.81	6.44	2.25	5.63	1.44	4.19	79.9918	3.64
T3B2/30b	0.82	2.25	1.92	1.43	1.1	0.33	25.0326	3.52
T3B2/30c	0.82	6.06	2.1	5.24	1.28	3.96	80.7936	3.55
T3B2/60a	0.81	11.34	2.61	10.53	1.8	8.73	93.2071	4.03
T3B2/60b	0.86	9.31	2.4	8.45	1.54	6.91	90.1013	4.07
T3B2/60c	0.87	9.71	2.73	8.84	1.86	6.98	87.6065	3.91
T3B3/0a	0.82	11.65	3.49	10.83	2.67	8.16	85.7736	4.01
T3B3/0b	0.82	12.75	3.8	11.93	2.98	8.95	86.4691	3.94
T3B3/0c	0.85	12.13	3.7	11.28	2.85	8.43	85.5819	3.87
T3B3/30a	0.85	9.04	3.13	8.19	2.28	5.91	80.0994	4
T3B3/30b	0.82	7.31	2.45	6.49	1.63	4.86	81.2604	3.77
T3B3/30c	0.87	7.36	2.69	6.49	1.82	4.67	78.3277	4.1
T3B3/60a	0.86	12.35	3.02	11.49	2.16	9.33	92.3886	4.2
T3B3/60b	0.82	10.99	2.81	10.17	1.99	8.18	90.3408	4.05
T3B3/60c	0.82	15.15	5.28	14.33	4.46	9.87	82.4478	3.95
T3C1/0a	0.86	22.44	6.48	21.58	5.62	15.96	94.3963	4.39
T3C1/0b	0.84	15.89	4.18	15.05	3.34	11.71	92.2501	4.16
T3C1/0c	0.83	15.3	5.62	14.47	4.79	9.68	80.5758	4.03
T3C1/30a	0.88	12.45	2.76	11.57	1.88	9.69	95.0886	3.75		F - foil
T3C1/30b	0.86	14.61	3.17	13.75	2.31	11.44	96.5864	3.63		F+MS - foil + moist soil
T3C1/30c	0.84	12.21	2.85	11.37	2.01	9.36	93.4166	3.66		F+Ds = foil + dry soil
T3C1/60a	0.81	11.89	3.19	11.08	2.38	8.7	89.24	4.17		SFW - soil fresh weight
T3C1/60b	0.86	16.87	5.19	16.01	4.33	11.68	88.176	4.43		SDW - soil dry weight
T3C1/60c	0.84	15.77	4.04	14.93	3.2	11.73	92.9186	4.38		H2O - grams of water
T3C2/0a	0.82	11.46	2.41	10.64	1.59	9.05	95.52	3.5		Moisture % - grams of water divided by soil fresh weight
T3C2/0b	0.88	11.56	3.16	10.68	2.28	8.4	89.0256	3.54
T3C2/0c	0.84	14.13	3.54	13.29	2.7	10.59	92.5235	3.48
T3C2/30a	0.83	5.19	2.47	4.36	1.64	2.72	66.7514	3.72
T3C2/30b	0.83	10.28	4.42	9.45	3.59	5.86	71.0368	4.12
T3C2/30c	0.88	9.86	4.29	8.98	3.41	5.57	70.6423	4.46
T3C2/60a	0.86	5.83	3.1	4.97	2.24	2.73	59.8828	3.84
T3C2/60b	0.83	5.91	2.88	5.08	2.05	3.03	64.6692	3.76
T3C2/60c	0.88	5.34	2.67	4.46	1.79	2.67	64.3491	4.27
T3C3/0a	0.88	7.51	2.64	6.63	1.76	4.87	79.9715	3.88
T3C3/0b	0.84	7.11	2.46	6.27	1.62	4.65	80.3359	3.94
T3C3/0c	0.88	9.4	2.39	8.52	1.51	7.01	90.6866	3.6
T3C3/30a	0.82	19.23	5.31	18.41	4.49	13.92	93.1289	5.05
T3C3/30b	0.84	19.31	5.93	18.47	5.09	13.38	89.932	5.08
T3C3/30c	0.83	23.32	5.92	22.49	5.09	17.4	98.7762	4.93
T3C3/60a	0.87	15.96	4.18	15.09	3.31	11.78	92.5638	4.24
T3C3/60b	0.84	16.17	4.36	15.33	3.52	11.81	91.7223	4.1
T3C3/60c	0.83	12.97	3.34	12.14	2.51	9.63	91.0677	4.01

## Sheet: Tansect 4
Sample ID	Fb (g)	F+MS (g)	F+DS (g)	SFW (g)	SDW (g)	H2O	Moisture%	pH	Comments
T4A1/0a	0.83	14.62	3.83	13.79	3	10.79	78.2451	3.96
T4A1/0b	0.82	13.65	4.14	12.83	3.32	9.51	74.1231	4.01
T4A1/0c	0.88	13.03	4.26	12.15	3.38	8.77	72.1811	4.03
T4A1/30a	0.85	15.57	6.53	14.72	5.68	9.04	61.413	4.05
T4A1/30b	0.84	16.24	6.53	15.4	5.69	9.71	63.0519	3.75
T4A1/30c	0.82	14.21	6.04	13.39	5.22	8.17	61.0157	4
T4A1/60a	0.87	14.48	3.78	13.61	2.91	10.7	78.6187	3.78
T4A1/60b	0.85	12.71	3.99	11.86	3.14	8.72	73.5245	3.96
T4A1/60c	0.84	9.94	3.11	9.1	2.27	6.83	75.0549	4.18
T4B1/30a	0.8	14.92	3.17	14.12	2.37	11.75	83.2153	4.08
T4B1/30b	0.84	10.17	2.55	9.33	1.71	7.62	81.672	4.1
T4B1/30c	0.82	10.59	2.53	9.77	1.71	8.06	82.4974	4.08
T4B2/0a	0.82	10.54	4.29	9.72	3.47	6.25	64.3004	5.42
T4B2/0b	0.85	12.26	4.83	11.41	3.98	7.43	65.1183	5.11
T4B2/0c	0.84	12.4	5.52	11.56	4.68	6.88	59.5156	5.09
T4B2/30a	0.82	19.45	9.16	18.63	8.34	10.29	55.2335	4.34
T4B2/30b	0.81	17.17	7.45	16.36	6.64	9.72	59.4132	4.35
T4B2/30c	0.85	18.06	7.76	17.21	6.91	10.3	59.8489	4.21
T4B2/60a	0.83	6.36	2.67	5.53	1.84	3.69	66.7269	3.84
T4B2/60b	0.83	6.25	2.56	5.42	1.73	3.69	68.0812	3.85
T4B2/60c	0.87	7.07	2.76	6.2	1.89	4.31	69.5161	3.84
T4B3/30a	0.85	7.22	2.31	6.37	1.46	4.91	77.0801	3.72
T4B3/30b	0.83	8.01	2.48	7.18	1.65	5.53	77.0195	3.57
T4B3/30c	0.81	7.37	2.27	6.56	1.46	5.1	77.7439	3.66
T4C3/0a	0.84	25.88	10.51	25.04	9.67	15.37	61.3818	4.2
T4C3/0b	0.83	18.47	7.66	17.64	6.83	10.81	61.2812	4.19
T4C3/0c	0.8	24.5	11.03	23.7	10.23	13.47	56.8354	4.33
T4C3/30a	0.86	12.74	3.96	11.88	3.1	8.78	73.9057	3.8
T4C3/30b	0.84	10.41	3.37	9.57	2.53	7.04	73.5632	3.9
T4C3/30c	0.84	9.6	3.25	8.76	2.41	6.35	72.4886	3.81
T4C3/60a	0.81	14.74	4.16	13.93	3.35	10.58	75.9512	3.79
T4C3/60b	0.87	15.47	4.44	14.6	3.57	11.03	75.5479	3.74
T4C3/60c	0.85	17.91	5.06	17.06	4.21	12.85	75.3224	3.76
